# Supplementary material for: Heterostructured ZnFe2O4@Ni3S2 nanosheet arrays on Ni foam as an efficient oxygen evolution catalyst
Source: Royal Society of Chemistry journal article supplement (doi:10.1039/d4cc00239c), 2024-01-01
Supplement: d4cc00239c1.pdf [file d4cc00239c1.pdf]

## Supporting Information

**Heterostructured ZnFe<sub>2</sub>O<sub>4</sub>@Ni<sub>3</sub>S<sub>2</sub> nanosheet arrays on Ni foam as an efficient oxygen evolution catalyst**

*Haiqing Liu,<sup>a</sup> Juhong Miao,<sup>\*a</sup> Yubin Wang,<sup>a</sup> Siyu Chen,<sup>a</sup> Yujia Tang<sup>a</sup> and Dongdong Zhu<sup>\*a</sup>*

<sup>a</sup> School of Chemistry and Materials Science, Nanjing University of Information Science & Technology, Nanjing, 210044, China.

E-mail: miaojh\_2008@163.com, dd.zhu@nuist.edu.cn

## 1. Experimental Section

### 1.1 Materials

Zinc(II) acetate anhydrous ( $\text{Zn}(\text{CH}_3\text{COO})_2$ ), iron(III) nitrate nonahydrate ( $\text{Fe}(\text{NO})_3 \cdot 9\text{H}_2\text{O}$ ), thiourea ( $\text{CH}_4\text{N}_2\text{S}$ ) and ammonium fluoride ( $\text{NH}_4\text{F}$ ) were purchased from Sinpharm Chemical Reagent Co. Ltd, China. Urea ( $\text{H}_2\text{NCONH}_2$ ) and Nickel(II) chloride hexahydrate ( $\text{NiCl}_2 \cdot 6\text{H}_2\text{O}$ ) were obtained from Aladdin Reagent Co. Ltd. Suzhou Sinero Technology Co., Ltd provided Nickel foam and  $\text{RuO}_2$ .

### 1.2 Synthesis of $\text{ZnFe}_2\text{O}_4/\text{NF}$

The successful growth of  $\text{ZnFe}_2\text{O}_4$  nanosheets on nickel foam was synthesized by a typical hydrothermal method. Firstly, the nickel foam ( $2 \text{ cm} \times 4 \text{ cm}$ ) was ultrasonically cleaned with 3 M HCl and anhydrous ethanol for 10 min to remove surface oxides and oils. Then, 0.5 mmol of  $\text{Zn}(\text{CH}_3\text{COO})_2$ , 1 mmol of  $\text{Fe}(\text{NO})_3 \cdot 9\text{H}_2\text{O}$ , 0.37 g of  $\text{NH}_4\text{F}$ , and 0.72 g of urea were dissolved in 30 mL of deionized water and stirred in an ultrasonic bath until a homogeneous clear solution was formed. The mixed solution and the pre-cleaned nickel foam substrate were transferred to a 50 mL sealed Teflon autoclave and reacted at  $140 \text{ }^\circ\text{C}$  for 4 hours. The resulted Zn-Fe precursor/NF and precursor powder were rinsed with water and ethanol, respectively, and dried in an oven at  $60 \text{ }^\circ\text{C}$  overnight. The above Zn-Fe precursor/NF and precursor powder were heated to  $350 \text{ }^\circ\text{C}$  in a muffle furnace exposed to air and calcined for 2 h at a heating rate of  $3 \text{ }^\circ\text{C} \cdot \text{min}^{-1}$  to obtain  $\text{ZnFe}_2\text{O}_4/\text{NF}$  and  $\text{ZnFe}_2\text{O}_4$  powder.

### 1.3 Synthesis of $\text{ZnFe}_2\text{O}_4@\text{Ni}_3\text{S}_2/\text{NF}$

$\text{ZnFe}_2\text{O}_4@\text{Ni}_3\text{S}_2/\text{NF}$  was synthesized by an electrochemical deposition process in a simple three-electrode electrochemical system. The prepared  $\text{ZnFe}_2\text{O}_4/\text{NF}$  ( $1 \times 2 \text{ cm}^2$ ), platinum foil ( $1 \times 1 \text{ cm}^2$ ) and saturated Ag/AgCl were used as the working electrode, counter electrode, and reference electrode, respectively. The electrodeposition solution was obtained by dissolving 2 mmol  $\text{NiCl}_2 \cdot 6\text{H}_2\text{O}$  and 40 mmol  $\text{CH}_4\text{N}_2\text{S}$  in 50 mL of deionized water and mixed thoroughly.  $\text{Ni}_3\text{S}_2$  nanosheets were electrochemically deposited on the  $\text{ZnFe}_2\text{O}_4$  nanosheets surface using cyclic voltammetry with a potential range of -1.2 to 0.2 V, a scan rate of  $5 \text{ mV s}^{-1}$ , and different electrodeposition cycles of 5, 10, 20 and 30. The resulted  $\text{ZnFe}_2\text{O}_4@\text{Ni}_3\text{S}_2/\text{NF}$  electrodes were washed several times with water and dried at  $60 \text{ }^\circ\text{C}$  for 12 h.

### 1.4 Synthesis of $\text{Ni}_3\text{S}_2/\text{NF}$

For comparison purpose,  $\text{Ni}_3\text{S}_2$  was prepared using the same electrodeposition procedure on pre-cleaned unmodified nickel foam electrodes.

### 1.5 Synthesis of RuO<sub>2</sub>/NF

The RuO<sub>2</sub> catalyst (20 mg) was first dispersed in a mixed solution with 1 mL of deionized water, 0.8 mL of anhydrous ethanol and 0.2 mL of 5 wt % Nafion solution. A homogeneous ink was formed after sonication for 30 min. Then, the prepared catalyst ink was dropped on a clean NF (1 × 1 cm<sup>2</sup>).

### 1.6 Characterization

All prepared electrodes were characterized via morphology, composition, and electrochemical tests. The structure of the prepared electrodes was characterized by X-ray powder diffraction (XRD) technology using a powder X-ray diffractometer (Bruker Rigaku-Dmax 2500) with CuK $\alpha$  radiation ( $\lambda = 0.15418$  nm) in the range from 5° to 80°. The microscopic morphology and dimension of the samples were obtained on field emission scanning electron microscopy (FE-SEM, ZEISS GeminiSEM 300) and field emission transmission electron microscope (TEM, FEI Tecnai G2 F30), respectively. X-ray photoelectron spectroscopy (XPS) was employed to measure the chemical state of the products at an ESCALABMK II x-ray photoelectron spectrometer with Mg as the excitation source.

### 1.7 Electrochemical characterization

The electrochemical performance was tested using a CHI 660E electrochemical workstation (Chenhua, Shanghai, China) and a three-electrode system. The working electrode was a prepared nickel foam composite electrode (1 × 1 cm<sup>2</sup>), the reference electrode was a Hg/HgO (1 M KOH) electrode, and the counting electrode was a graphite rod electrode. All electrochemical tests were carried out in an electrolyte of 1 M KOH at room temperature and the potential values tested were calibrated according to the reversible hydrogen electrode  $E(\text{RHE}) = E(\text{Hg}/\text{HgO}) + 0.059\text{pH} + 0.098$ . After activation with a least of 100 turns of cyclic voltammetry (CV) scanning performed, cyclic voltammetry (CV), Linear sweep voltammetry (LSV), Chronopotentiometry (CP), electrochemical impedance spectroscopy (EIS), and double-layer capacitance ( $C_{\text{dl}}$ ) were used to measure the electrochemical catalytic performance of OER, respectively.  $C_{\text{dl}}$  was evaluated by fitting the average anodic and cathodic current densities ( $\Delta j = (j_{\text{a}} - j_{\text{c}}) / 2$ ) at a voltage of -0.1 V (vs. Hg/HgO) to the scan rate. Polarization curves were recorded by linear sweep voltammetry at a scan rate of 2 mV s<sup>-1</sup> after the CV curve had stabilized and were all compensated for by a 90% drop in  $iR$ .

## 2. Supplementary Figures and Tables

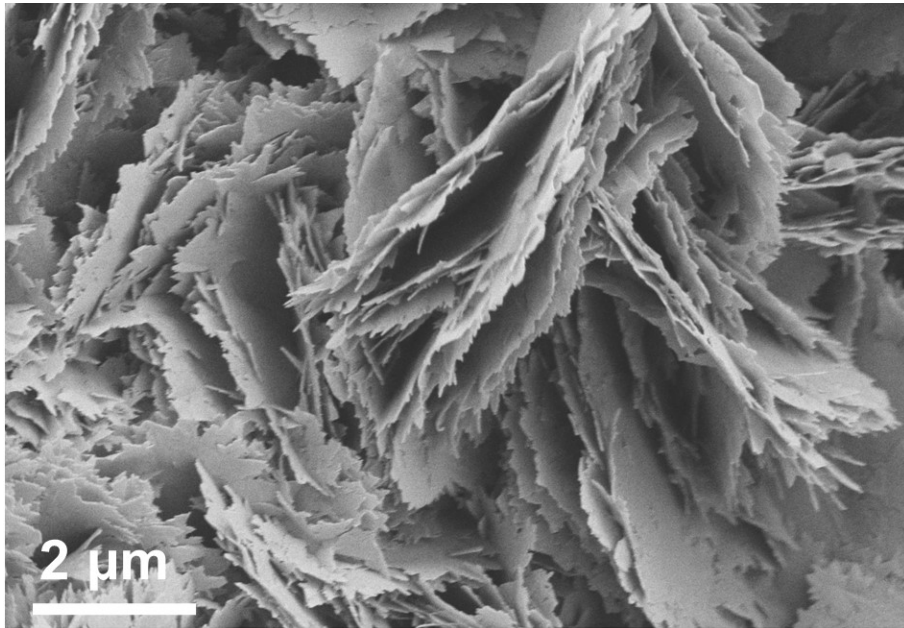

Figure S1. SEM image of Zn-Fe precursors/NF.

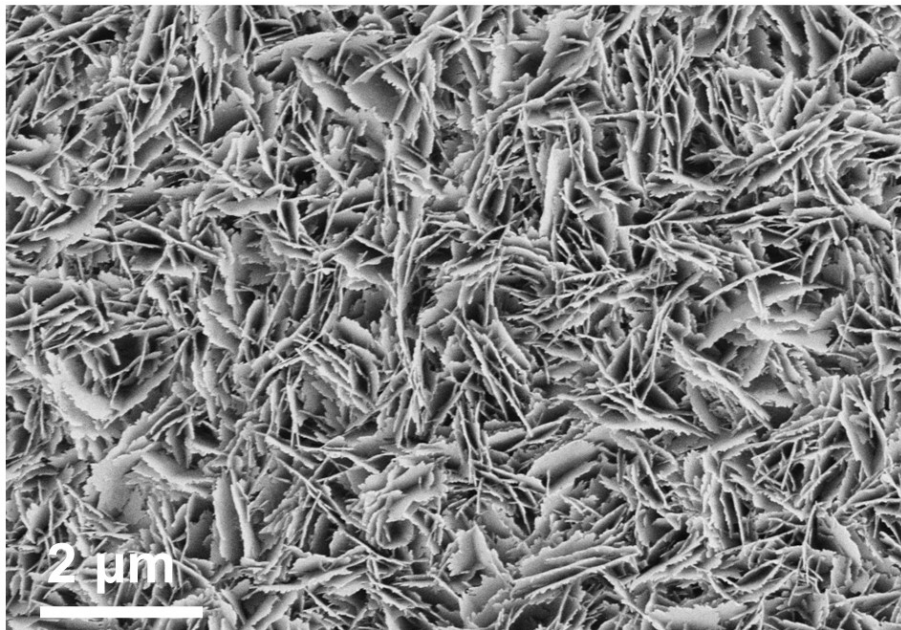

Figure S2. SEM image of  $\text{ZnFe}_2\text{O}_4/\text{NF}$ .

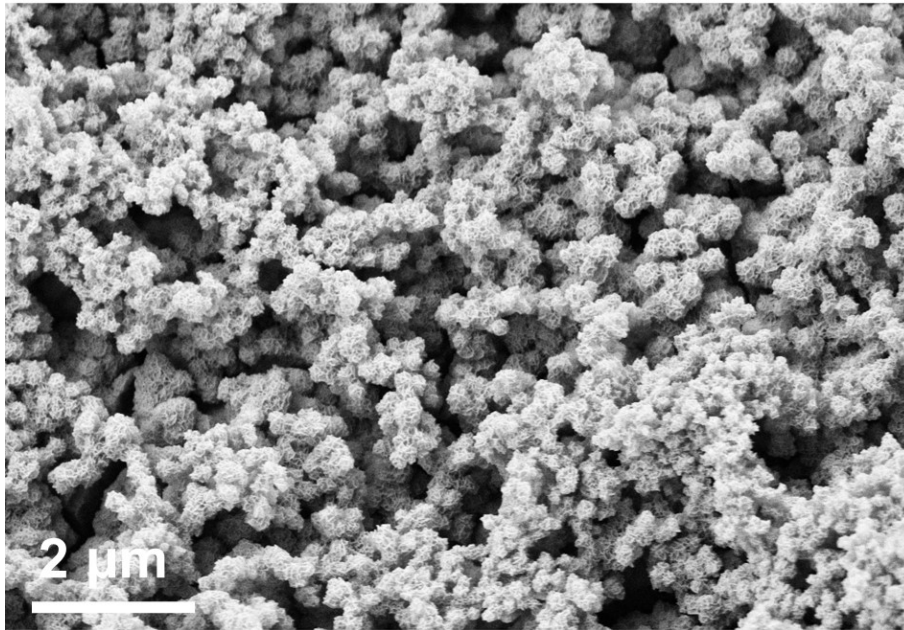

Figure S3. SEM image of  $\text{Ni}_3\text{S}_2/\text{NF}$ .

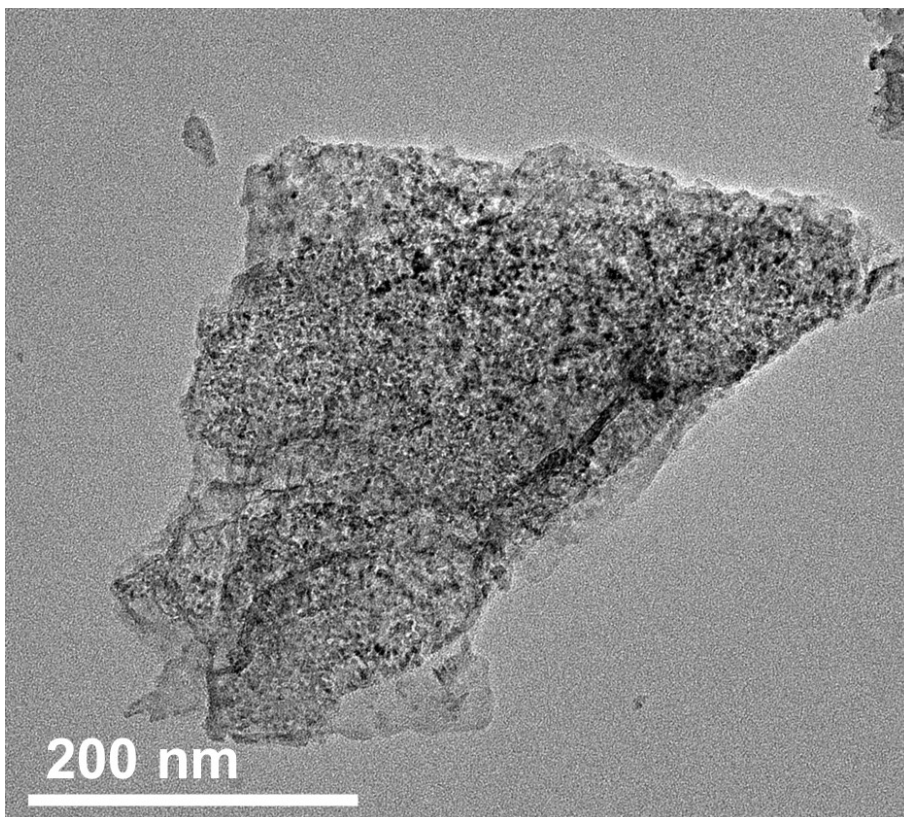

Figure S4. HRTEM image of  $\text{ZnFe}_2\text{O}_4@ \text{Ni}_3\text{S}_2/\text{NF}$ .

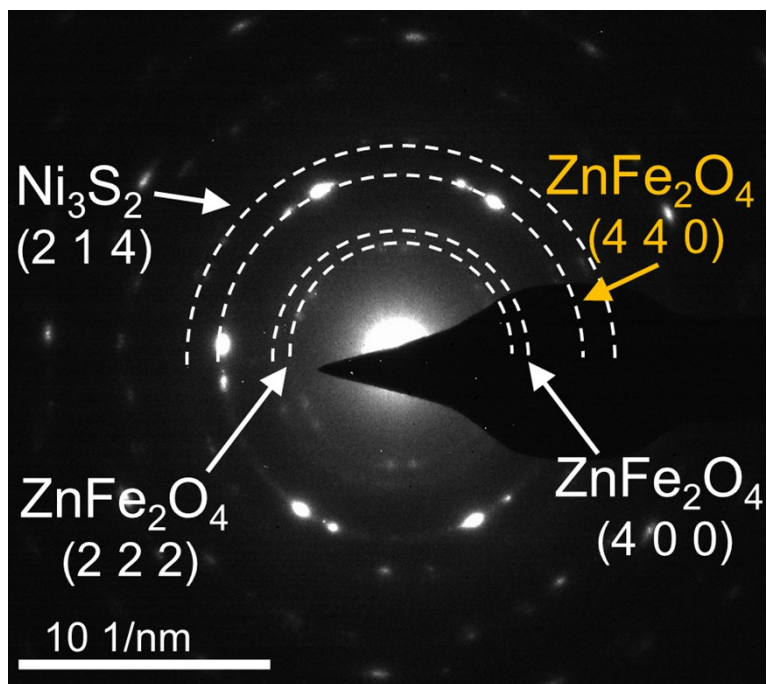

Figure S5. SAED pattern of ZnFe<sub>2</sub>O<sub>4</sub>@Ni<sub>3</sub>S<sub>2</sub>/NF.

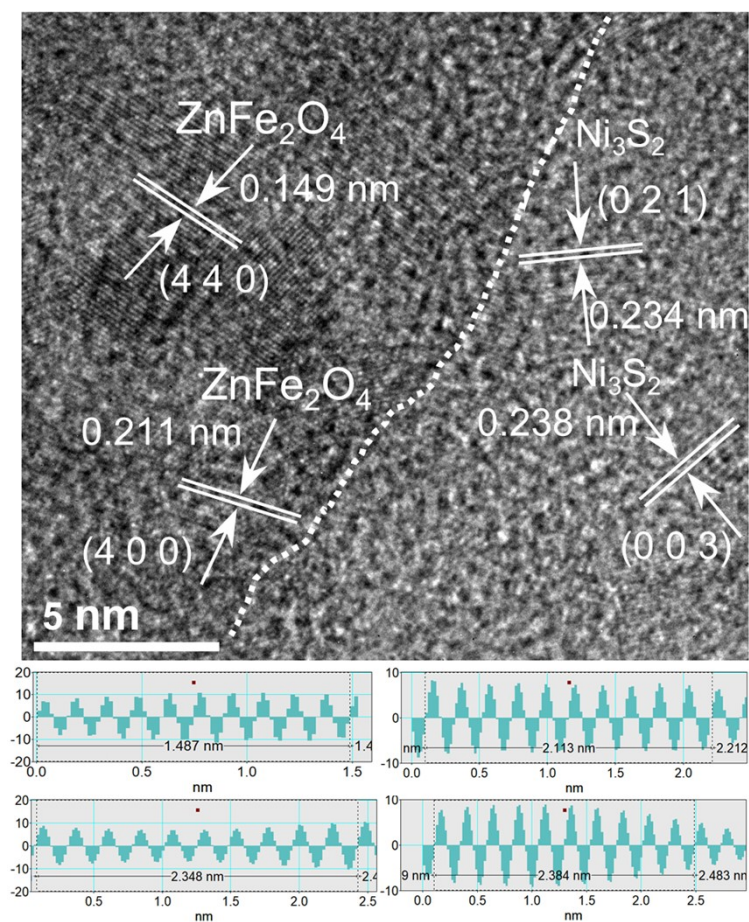

Figure S6. HRTEM image and corresponding profile of ZnFe<sub>2</sub>O<sub>4</sub>@Ni<sub>3</sub>S<sub>2</sub>/NF.

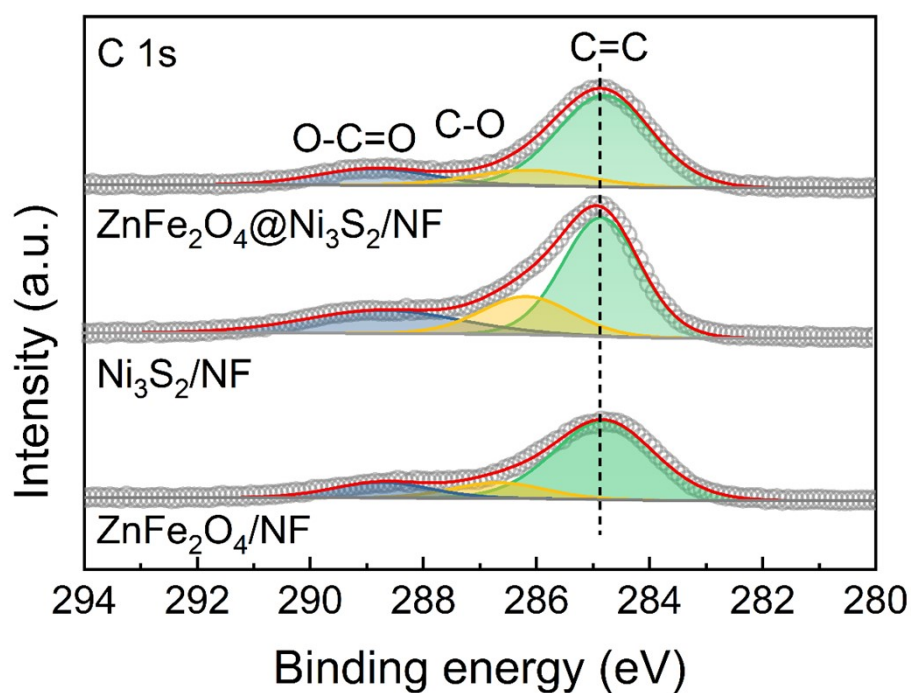

Figure S7. C 1s high-resolution spectra of the  $\text{ZnFe}_2\text{O}_4/\text{NF}$ ,  $\text{Ni}_3\text{S}_2/\text{NF}$  and  $\text{ZnFe}_2\text{O}_4@\text{Ni}_3\text{S}_2/\text{NF}$ .

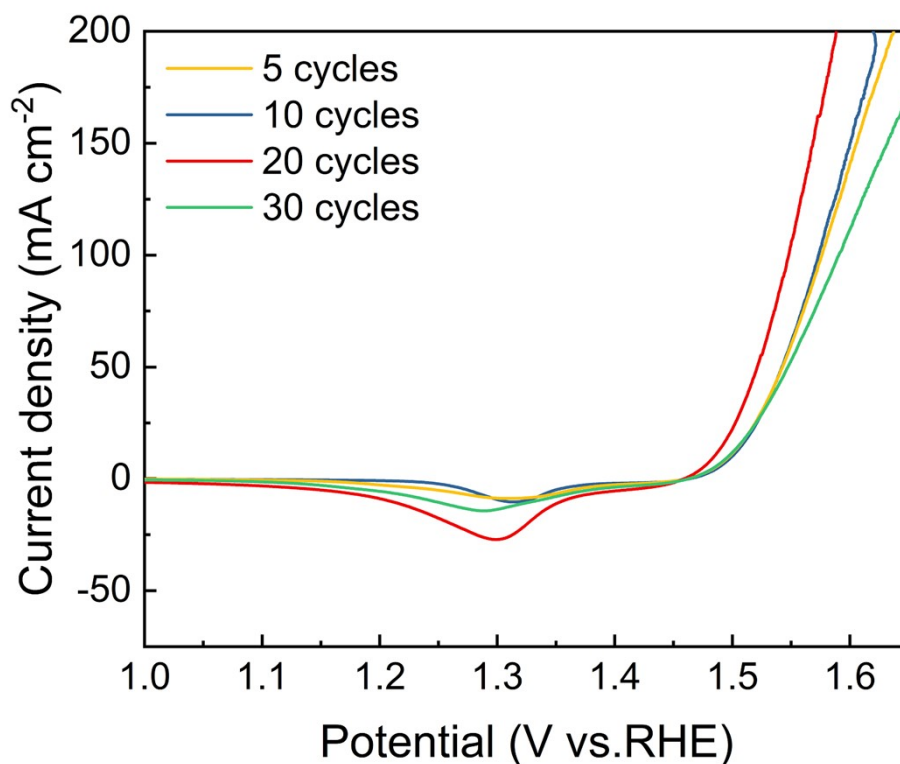

Figure S8. Polarization curves of  $\text{ZnFe}_2\text{O}_4@\text{Ni}_3\text{S}_2/\text{NF}$  at different electrodeposition cycle.

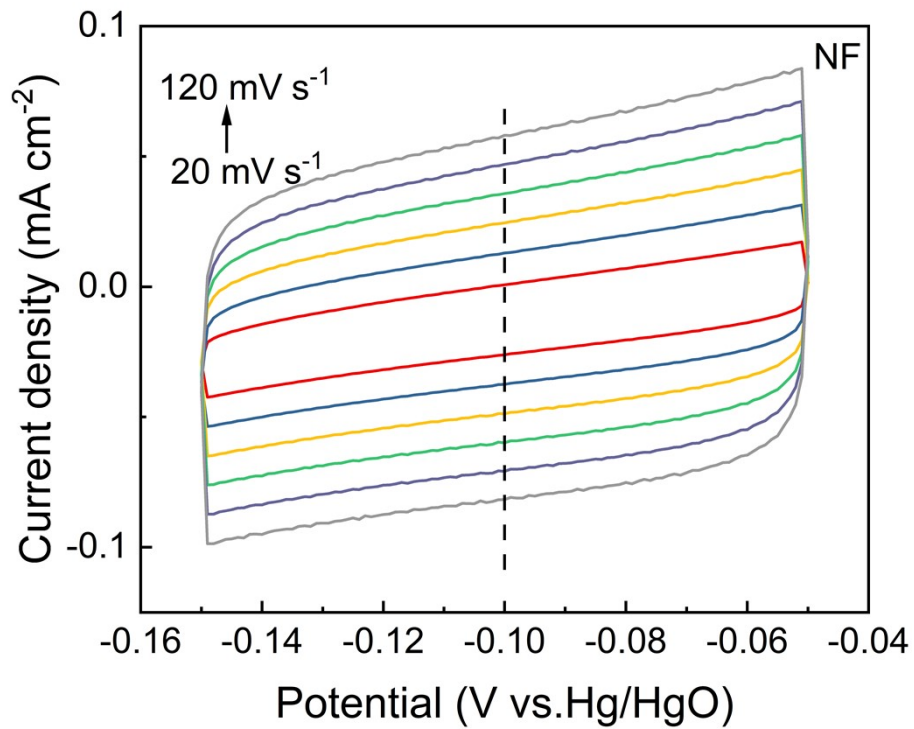

Figure S9. CV curves for NF at scan rates from 20 to 120 mV s<sup>-1</sup>.

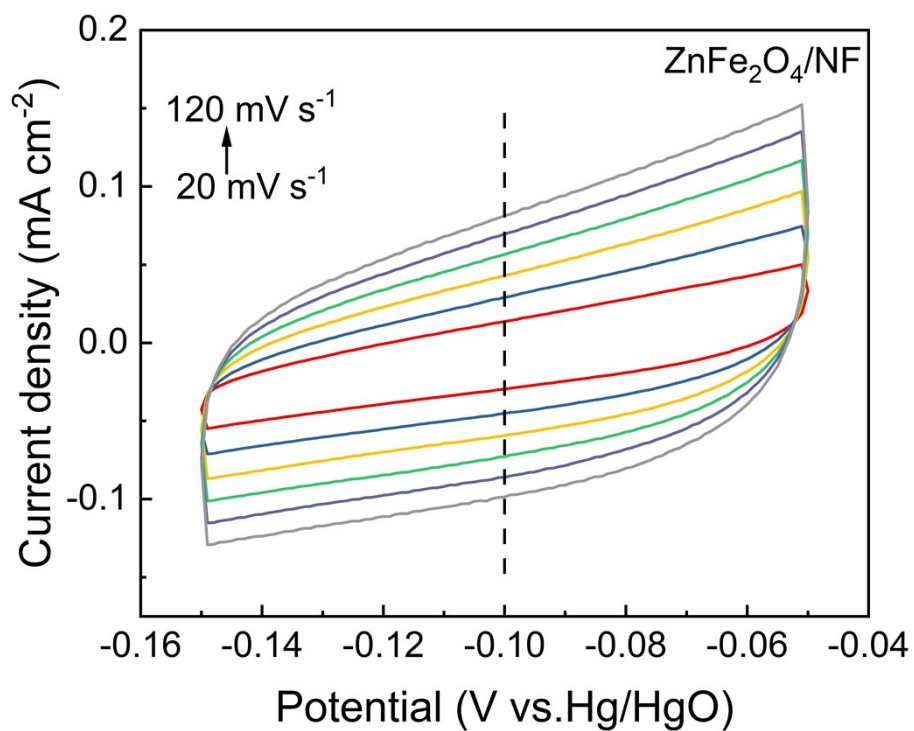

Figure S10. CV curves for ZnFe<sub>2</sub>O<sub>4</sub>/NF at scan rates from 20 to 120 mV s<sup>-1</sup>.



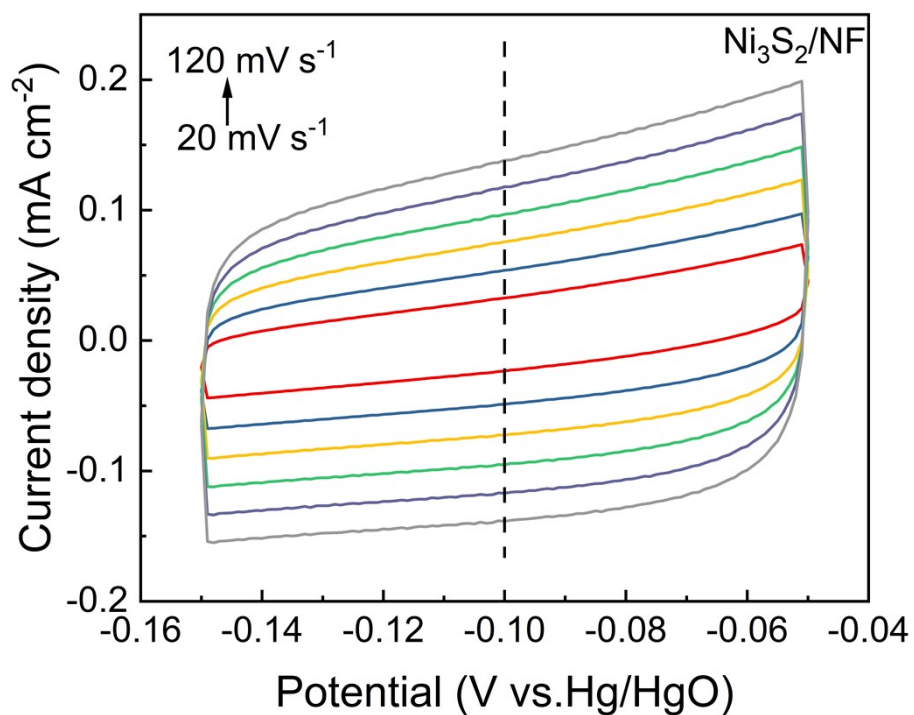

Figure S11. CV curves for  $\text{Ni}_3\text{S}_2/\text{NF}$  at scan rates from 20 to 120  $\text{mV s}^{-1}$ .

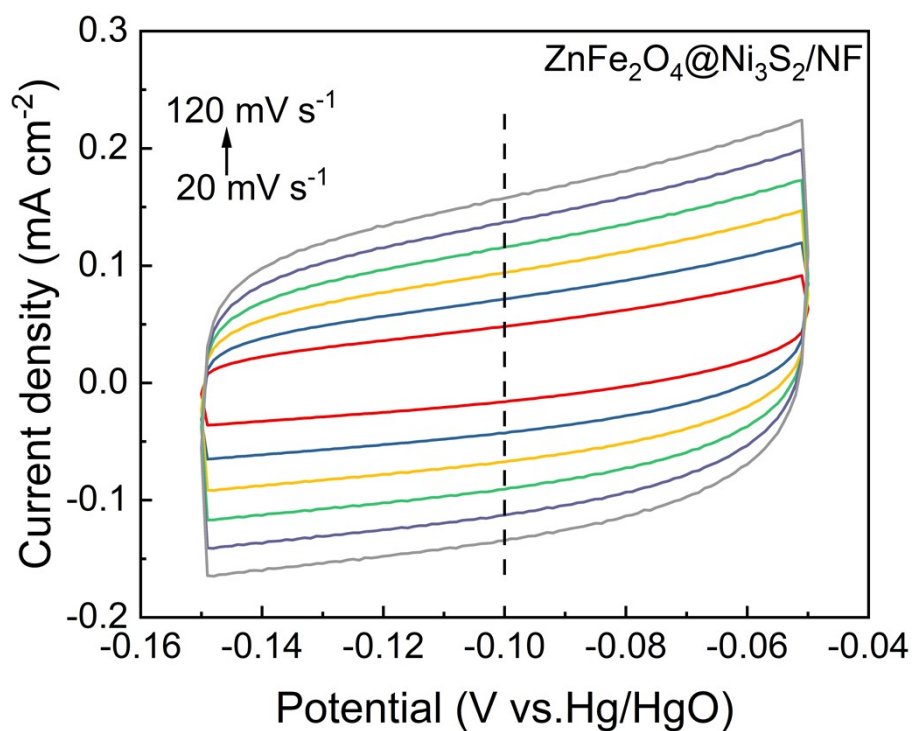

Figure S12. CV curves for  $\text{ZnFe}_2\text{O}_4@\text{Ni}_3\text{S}_2/\text{NF}$  at scan rates from 20 to 120  $\text{mV s}^{-1}$ .

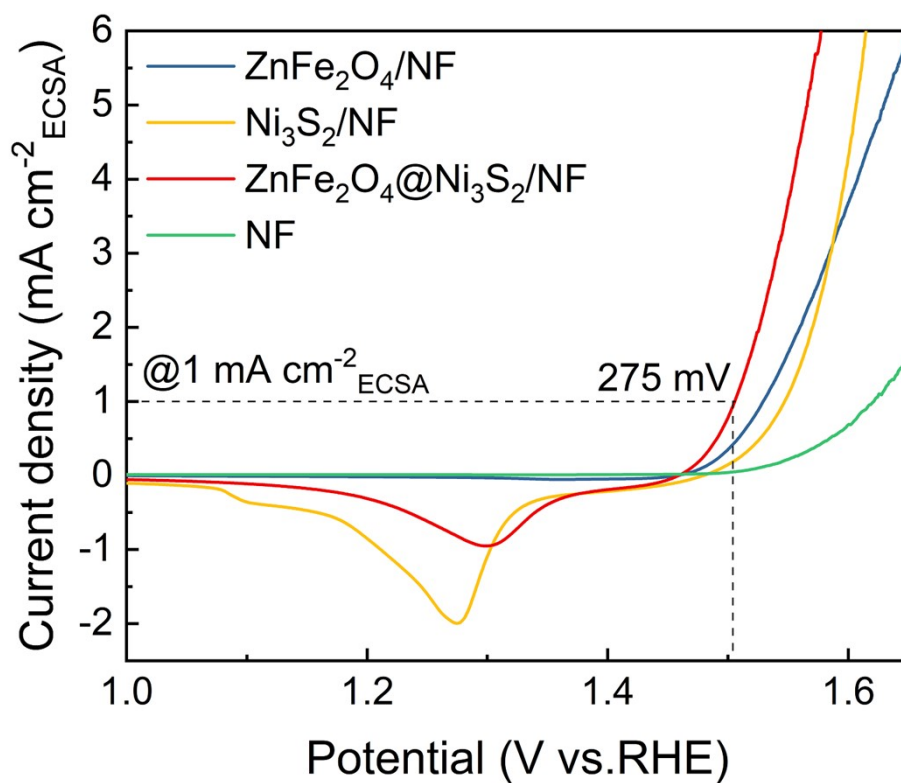

Figure S13. OER polarization curve of ZnFe<sub>2</sub>O<sub>4</sub>@Ni<sub>3</sub>S<sub>2</sub>/NF initial and after 1000 CV cycles.

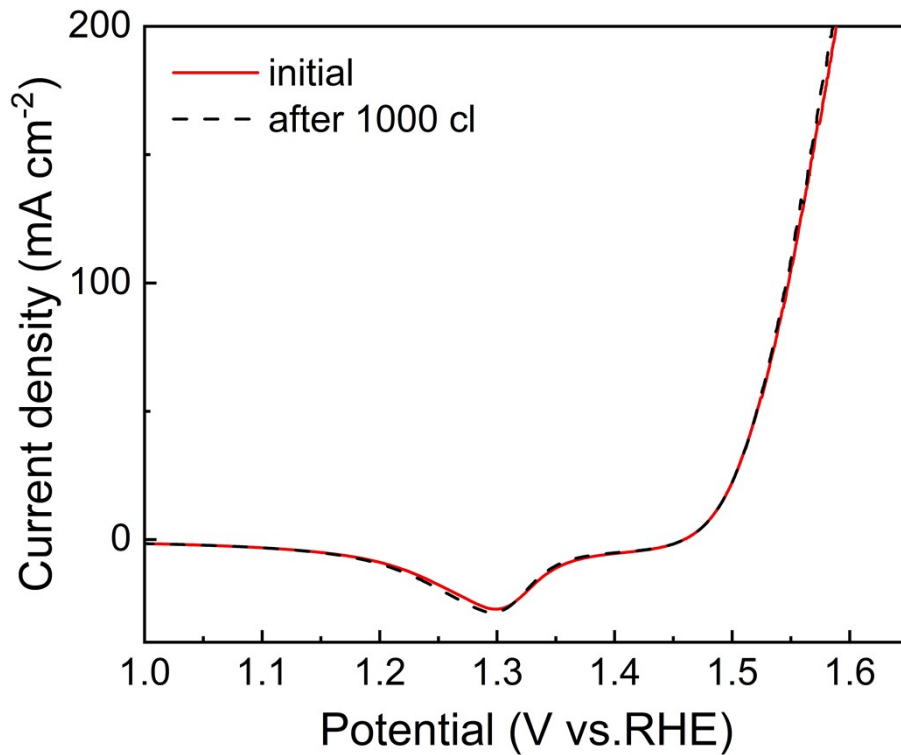

Figure S14. OER polarization curve of ZnFe<sub>2</sub>O<sub>4</sub>@Ni<sub>3</sub>S<sub>2</sub>/NF initial and after 1000 CV cycles.

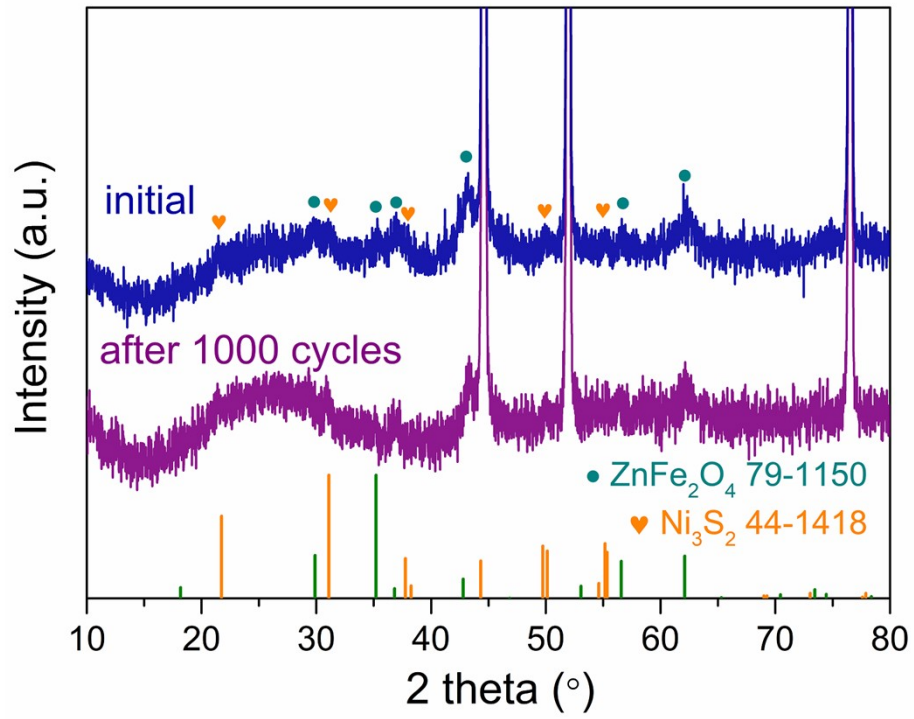

Figure S15. XRD image of ZnFe<sub>2</sub>O<sub>4</sub>@Ni<sub>3</sub>S<sub>2</sub>/NF initial and after 1000 CV cycles.

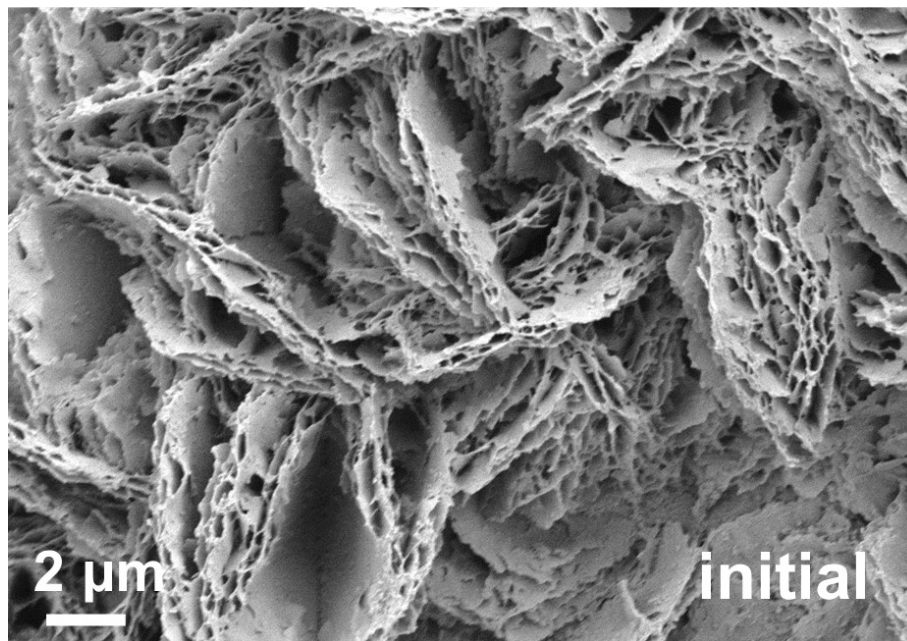

Figure S16. SEM image of ZnFe<sub>2</sub>O<sub>4</sub>@Ni<sub>3</sub>S<sub>2</sub>/NF initial.

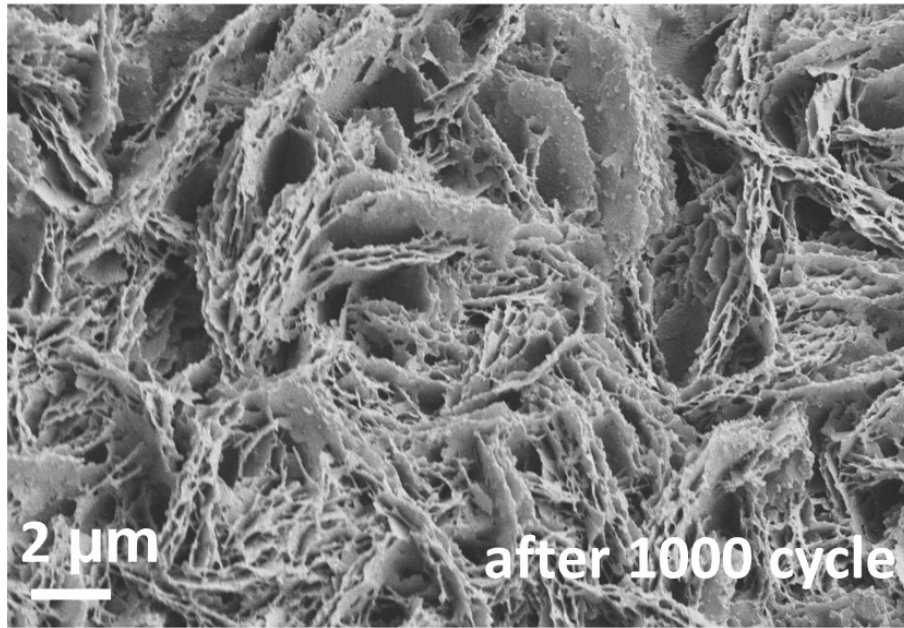

Figure S17. SEM image of ZnFe<sub>2</sub>O<sub>4</sub>@Ni<sub>3</sub>S<sub>2</sub>/NF after 1000 CV cycle.

Table S1. Comparison of OER performance for ZnFe<sub>2</sub>O<sub>4</sub>@Ni<sub>3</sub>S<sub>2</sub>/NF with other reported non-noble systems.

| Catalysts                                                              | Overpotential<br>(mV)<br>at 10 mA cm <sup>-2</sup> | Tafel slope<br>(mV dec <sup>-1</sup> ) | Electrolyte | Ref.                                    |
|------------------------------------------------------------------------|----------------------------------------------------|----------------------------------------|-------------|-----------------------------------------|
| NiCo <sub>2</sub> O <sub>4</sub> @MoS <sub>2</sub> /TM                 | 313                                                | 66.8                                   | 1.0 M KOH   | Bao <i>et al.</i> <sup>1</sup>          |
| ZnFe <sub>2</sub> O <sub>4</sub> @ZnFe <sub>2</sub> S <sub>4</sub> /NF | 320                                                | 73                                     | 1.0 M KOH   | Mohammadpour <i>et al.</i> <sup>2</sup> |
| ZnFe <sub>1.25</sub> Al <sub>0.75</sub> O <sub>4</sub> /NF             | 270                                                | 79                                     | 1.0 M KOH   | Moon <i>et al.</i> <sup>3</sup>         |
| NiFe <sub>2</sub> O <sub>4</sub> /N-graphene                           | 340                                                | 93.2                                   | 1.0 M KOH   | Navadeepthy <i>et al.</i> <sup>4</sup>  |
| CoS/NiFe <sub>2</sub> O <sub>4</sub> /NF                               | 227                                                | 53                                     | 1.0 M KOH   | Meng <i>et al.</i> <sup>5</sup>         |
| CoFe <sub>2</sub> O <sub>4</sub> /NF                                   | 287                                                | 43                                     | 1.0 M KOH   | Lee <i>et al.</i> <sup>6</sup>          |
| SnFe <sub>2</sub> O <sub>4</sub> /NF                                   | 263                                                | 57                                     | 1.0 M KOH   | Rajput <i>et al.</i> <sup>7</sup>       |
| CuCo <sub>2</sub> O <sub>4</sub> -CuO/NF                               | 289                                                | 73                                     | 1.0 M KOH   | Silva <i>et al.</i> <sup>8</sup>        |
| NiCo LDH/NiCoS/CC                                                      | 207                                                | 48                                     | 1.0 M KOH   | Li <i>et al.</i> <sup>9</sup>           |
| H-CoS <sub>x</sub> @NiFe<br>LDH/NF                                     | 250                                                | 49                                     | 1.0 M KOH   | Lee <i>et al.</i> <sup>10</sup>         |
| N- Fe <sub>2</sub> O <sub>3</sub> /NiTe <sub>2</sub> /NF               | 253                                                | 57.7                                   | 1.0 M KOH   | Li <i>et al.</i> <sup>11</sup>          |
| ZnFe <sub>2</sub> O <sub>4</sub> @Ni <sub>3</sub> S <sub>2</sub> /NF   | 254                                                | 39.29                                  | 1.0 M KOH   | This work                               |

## References

1. W. W. Bao, Y. Li, J. J. Zhang, T. T. Ai, C. M. Yang and L. L. Feng, *Int. J. Hydrogen Energy*, 2023, **48**, 12176-12184.
2. E. Mohammadpour and K. Asadpour-Zeynali, *Int. J. Hydrogen Energy*, 2021, **46**, 26940-26949.
3. H. Moon, N. Son, M. S. Goh, T. Yoon, J. Kim, C. Liu, Y. Im, S. J. Yoon and M. Kang, *Appl. Surf. Sci.*, 2023, **632**, 12.
4. D. Navadeepthy, A. Rebekah, C. Viswanthan and N. Ponpandian, *Int. J. Hydrogen Energy*, 2021, **46**, 21512-21524.
5. L. X. Meng, H. C. Xuan, G. H. Zhang, R. Wang, J. Wang, Y. Y. Guan, X. Yu, X. H. Liang, Y. P. Li and P. D. Han, *Electrochim. Acta*, 2022, **404**, 10.
6. G. H. Y. Lee, M. Jeong, H. R. Kim, M. Kwon, S. Baek, S. Oh, M. H. Y. Lee, D. J. Lee and J. H. Joo, *ACS Appl. Mater. Interfaces*, 2022, **14**, 48598-48608.
7. A. Rajput, A. A. Pandey, A. Kundu and B. Chakraborty, *Chem. Commun.*, 2023, **59**, 4943-4946.
8. T. R. Silva, R. A. Raimundo, V. D. Silva, J. R. D. Santos, A. J. M. Araújo, J. Oliveira, L. C. de Lima, F. F. da Silva, L. D. Ferreira and D. A. Macedo, *Int. J. Hydrogen Energy*, 2023, **48**, 17160-17176.
9. J. H. Li, L. L. Wang, H. J. He, Y. Q. Chen, Z. R. Gao, N. Ma, B. Wang, L. L. Zheng, R. L. Li, Y. J. Wei, J. Q. Xu, Y. Xu, B. W. Cheng, Z. Yin and D. Ma, *Nano Res.*, 2022, **15**, 4986-4995.
10. Y. J. Lee and S. K. Park, *Small*, 2022, **18**, 10.
11. W. J. Li, Y. Q. Deng, L. Luo, Y. S. Du, X. H. Cheng and Q. Wu, *J. Colloid Interface Sci.*, 2023, **639**, 416-423.
