# Supplementary figures and images for: Heterostructured ZnFe2O4@Ni3S2 nanosheet arrays on Ni foam as an efficient oxygen evolution catalyst
Source: Royal Society of Chemistry journal article supplement (doi:10.1039/d4cc00239c), 2024-01-01

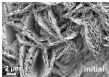

Supplement: d4cc00239c10.pdf [file d4cc00239c10.pdf]

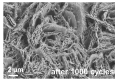

Supplement: d4cc00239c11.pdf [file d4cc00239c11.pdf]

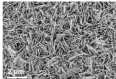

Supplement: d4cc00239c12.pdf [file d4cc00239c12.pdf]

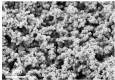

Supplement: d4cc00239c13.pdf [file d4cc00239c13.pdf]

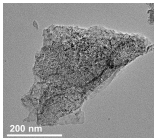

Supplement: d4cc00239c14.pdf [file d4cc00239c14.pdf]

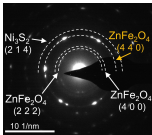

Supplement: d4cc00239c15.pdf [file d4cc00239c15.pdf]

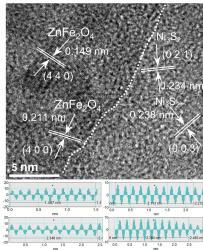

Supplement: d4cc00239c16.pdf [file d4cc00239c16.pdf]

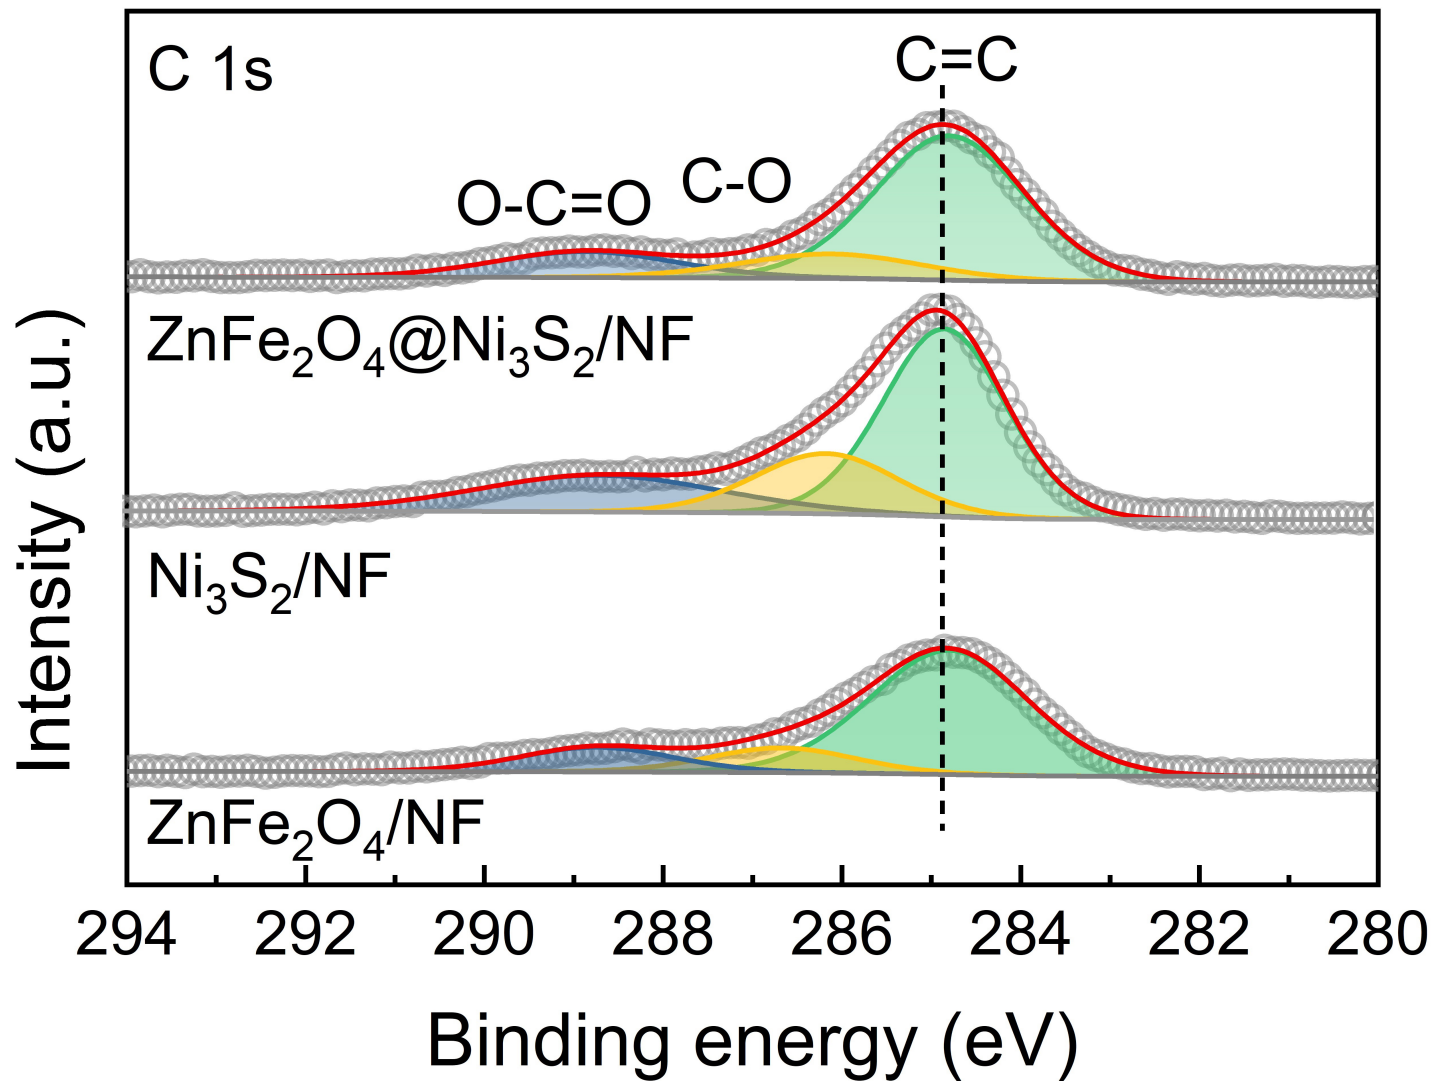

Supplement: d4cc00239c17.pdf [file d4cc00239c17.pdf]

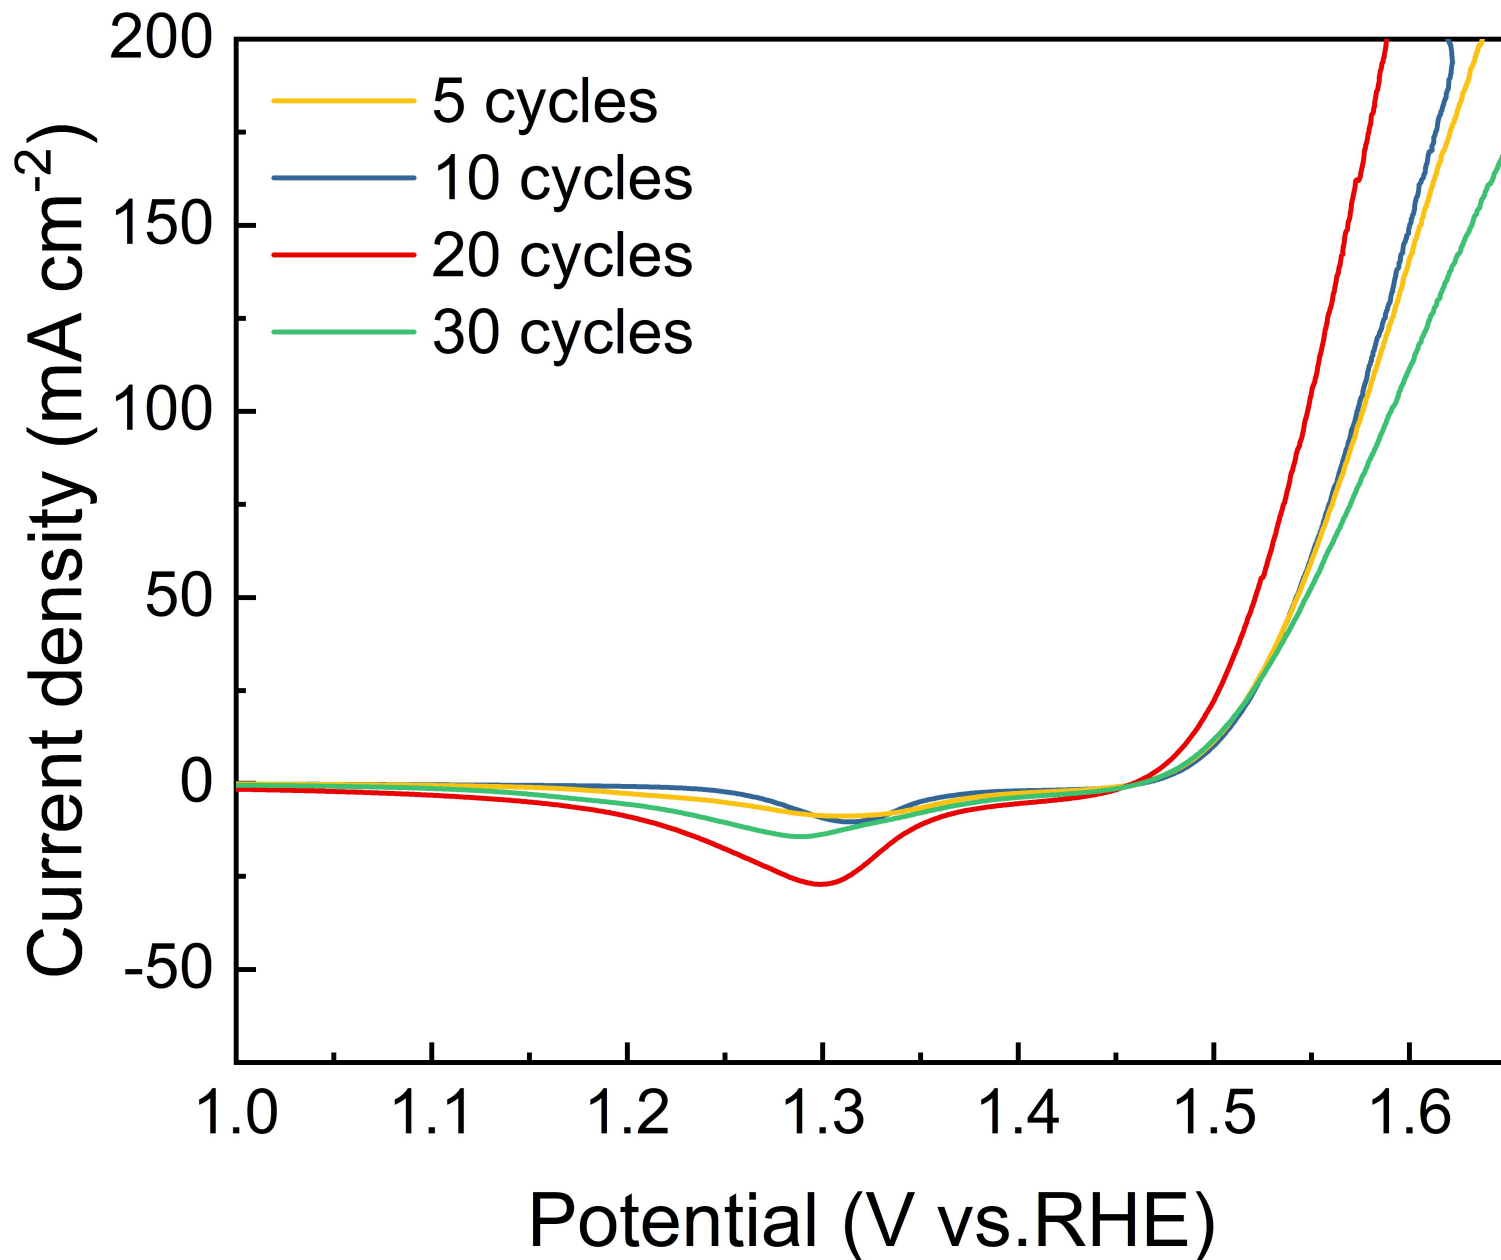

Supplement: d4cc00239c18.pdf [file d4cc00239c18.pdf]

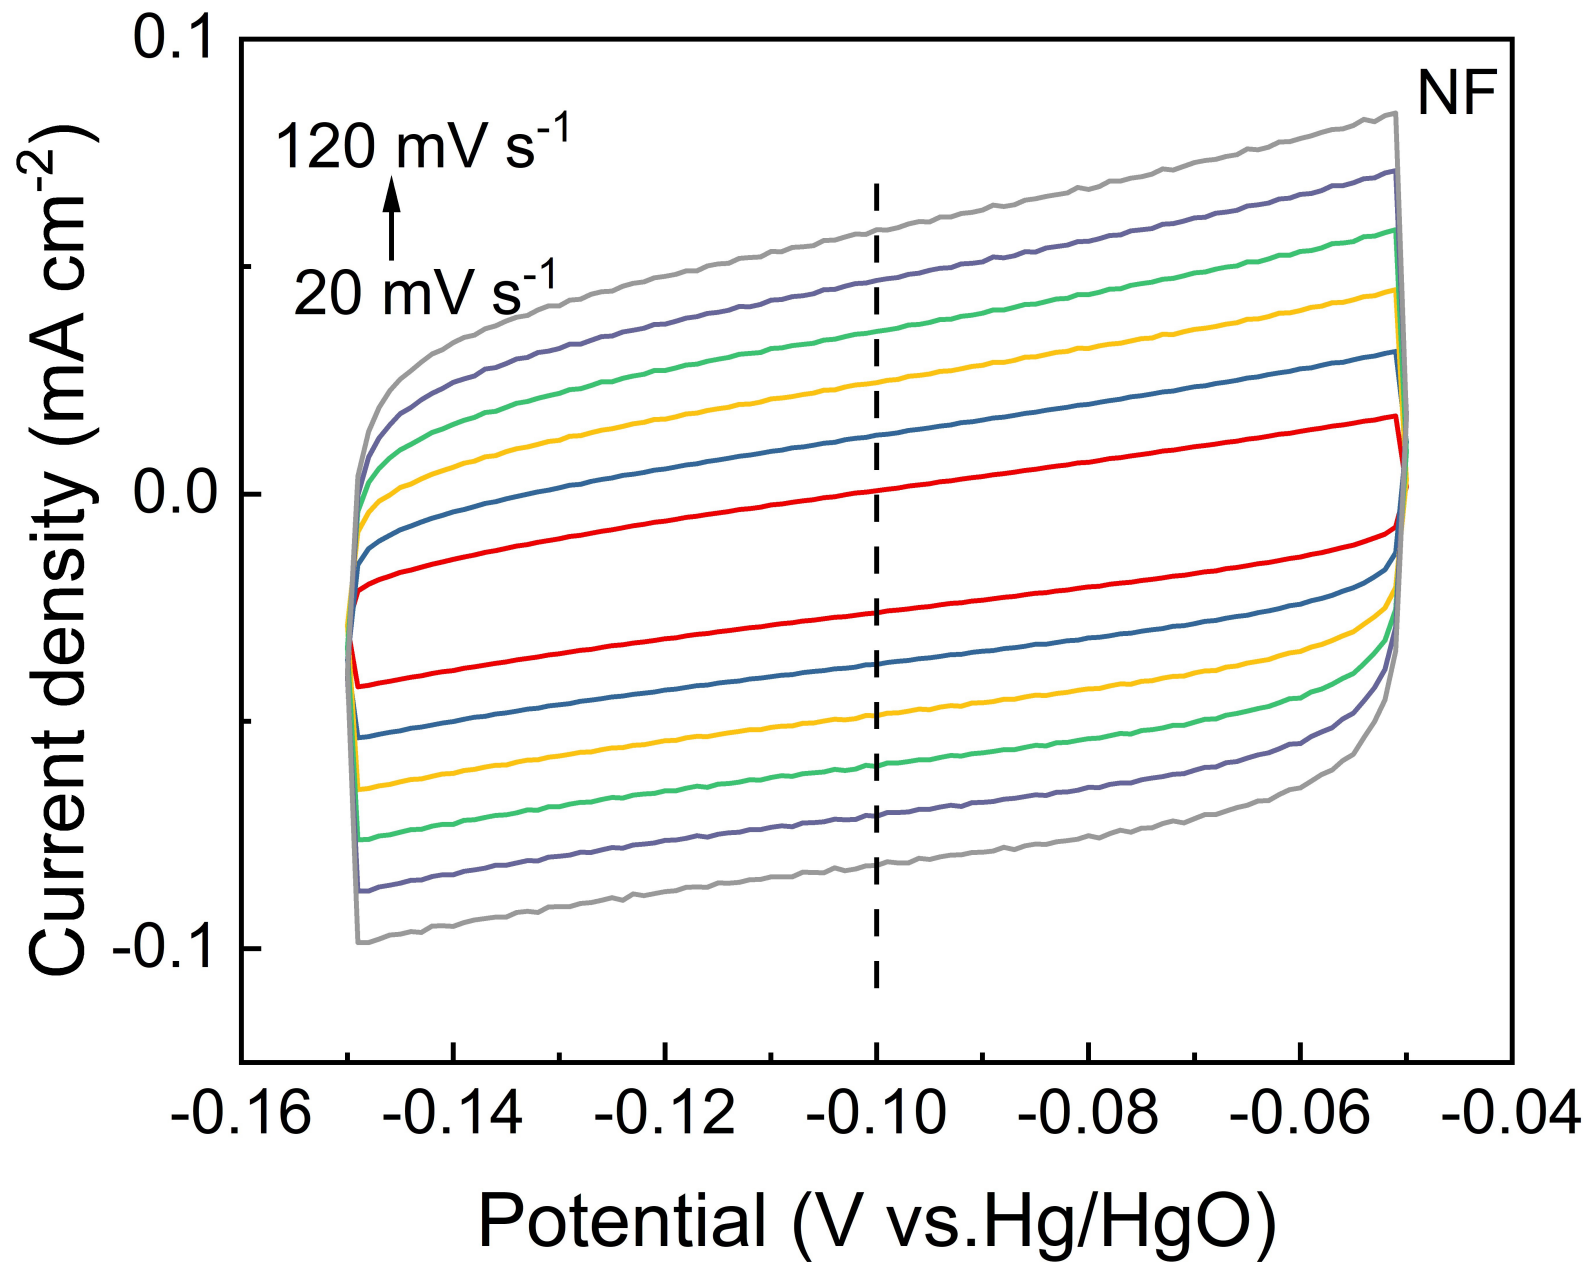

Supplement: d4cc00239c19.pdf [file d4cc00239c19.pdf]

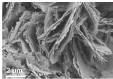

Supplement: d4cc00239c3.pdf [file d4cc00239c3.pdf]

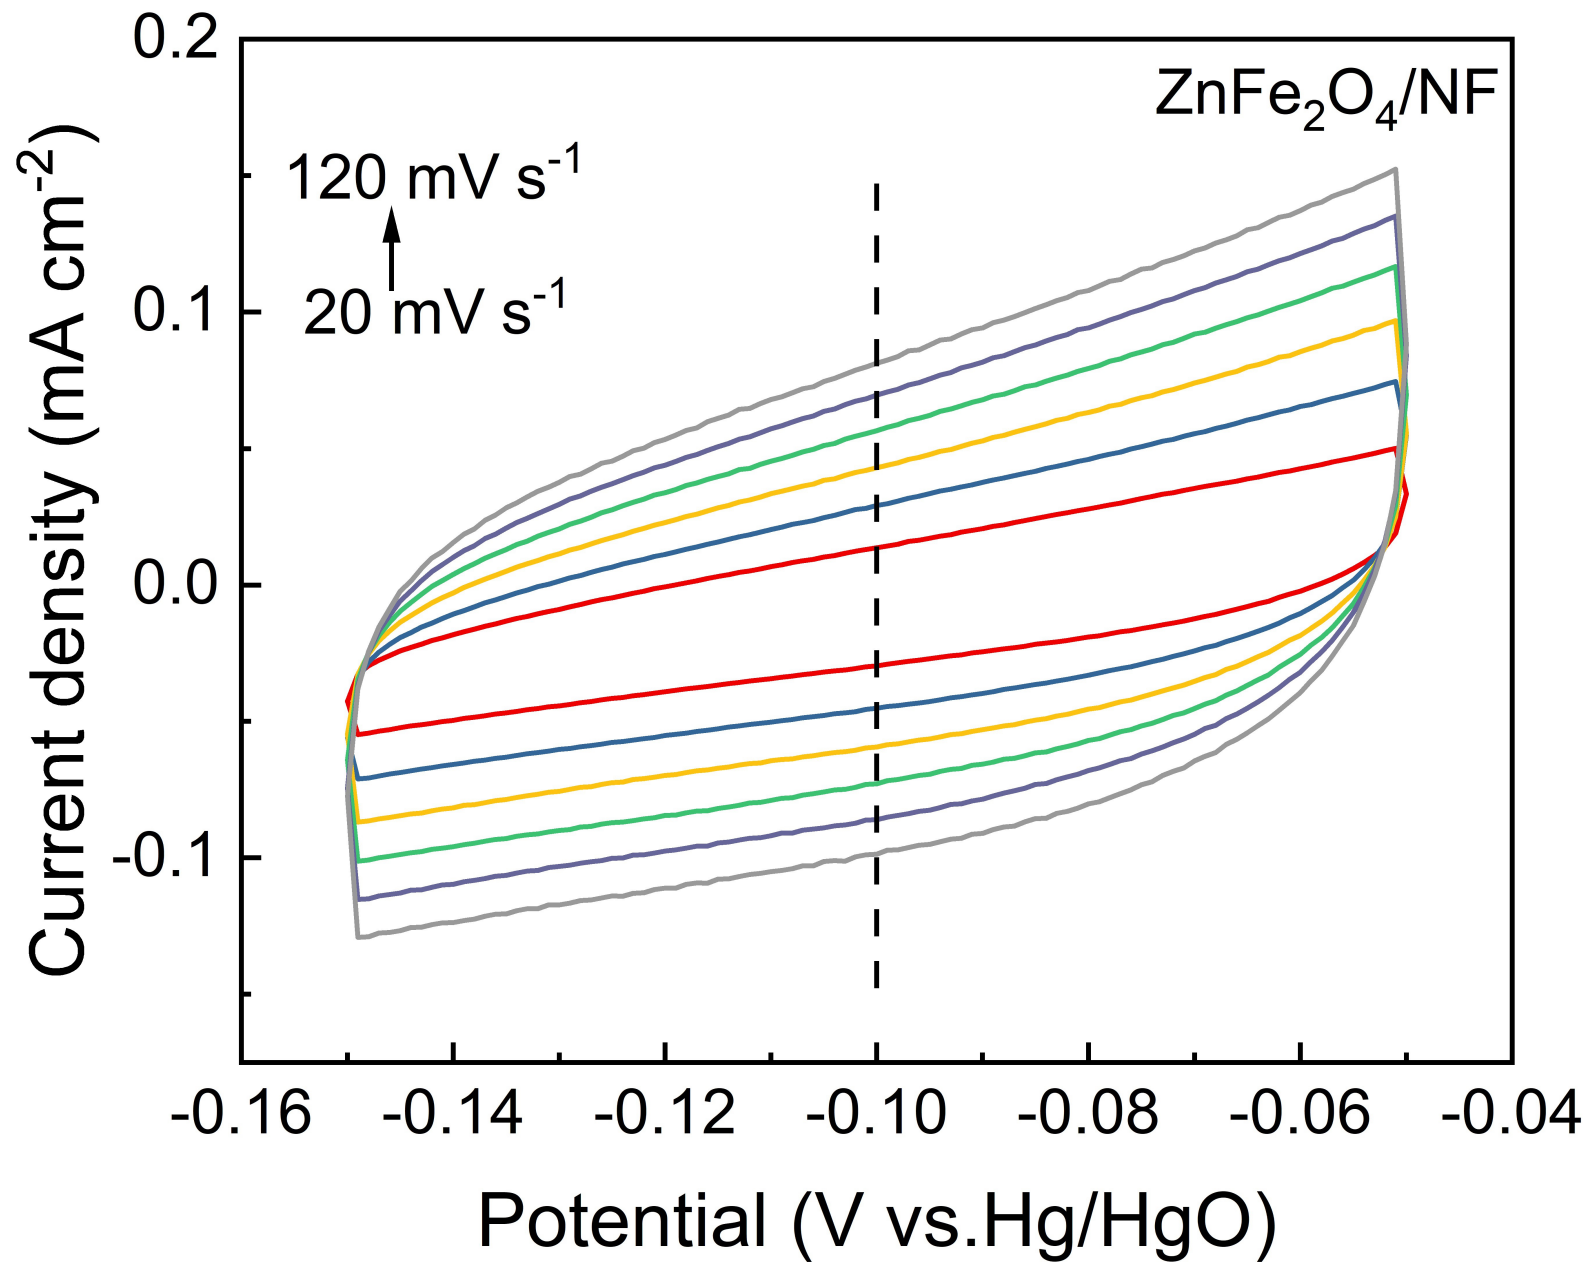

Supplement: d4cc00239c4.pdf [file d4cc00239c4.pdf]

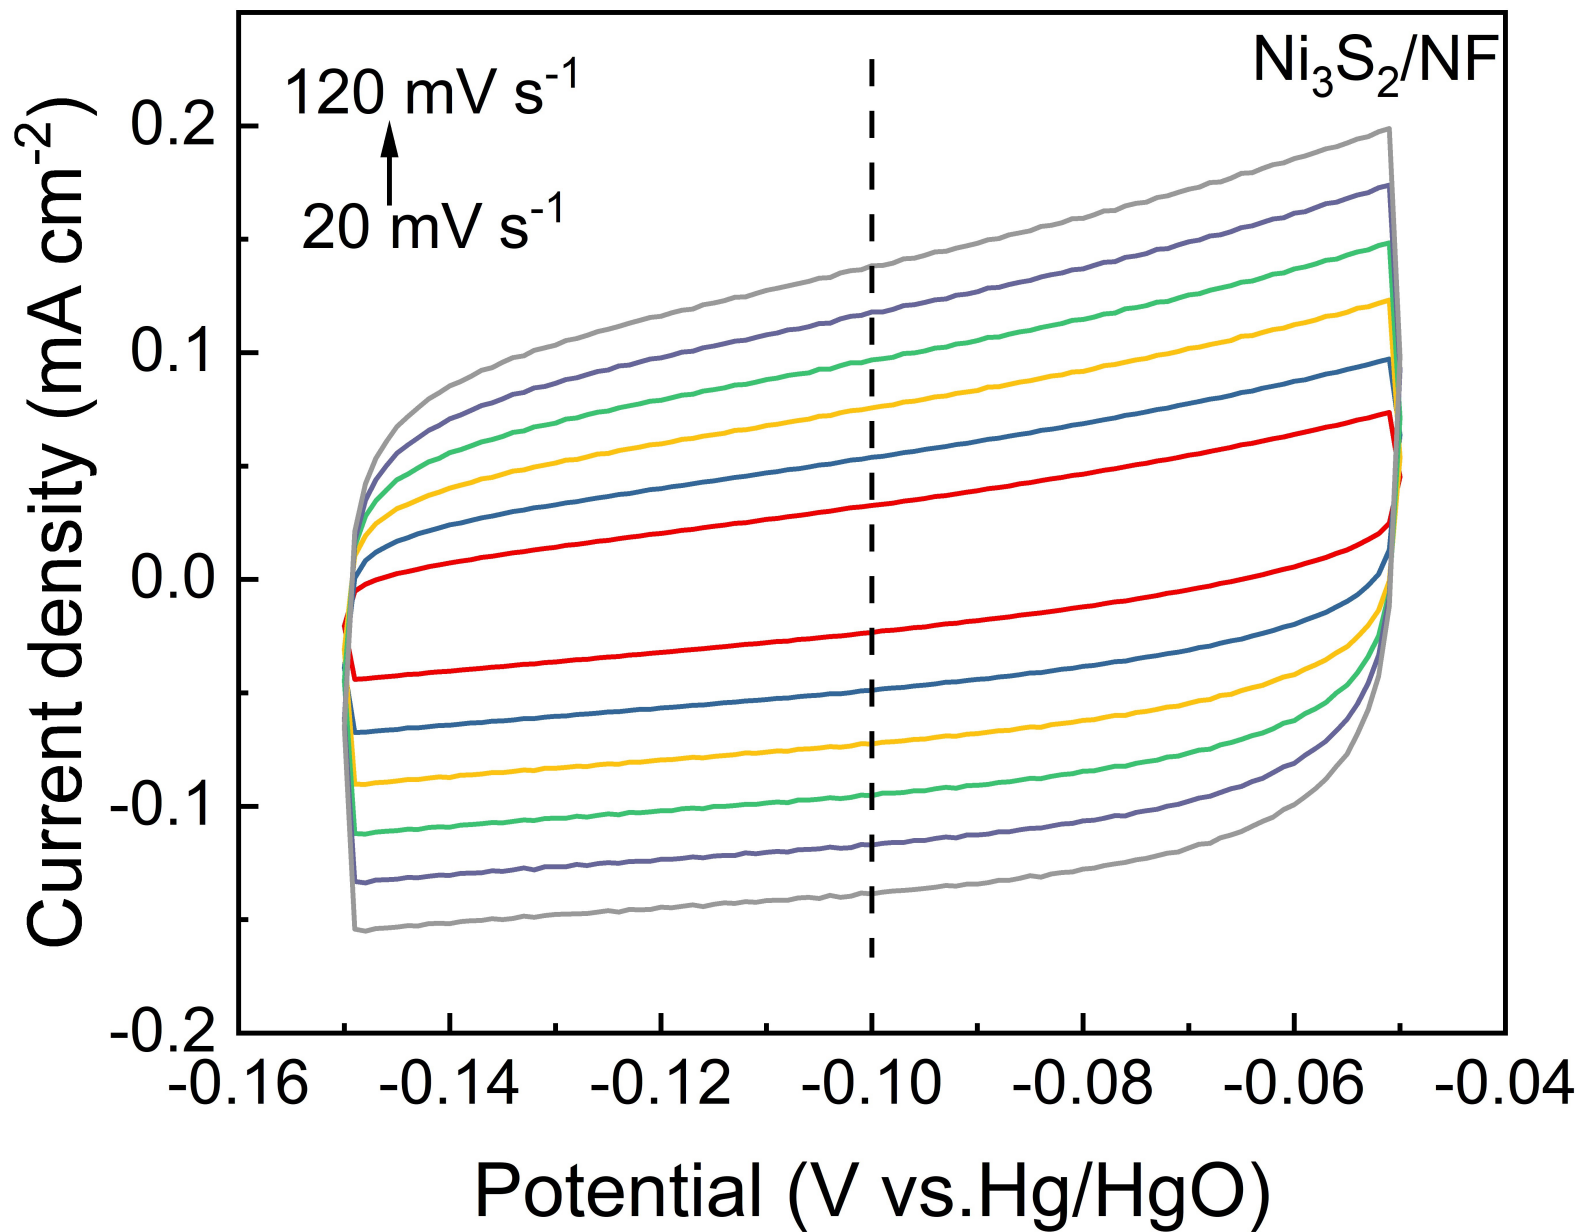

Supplement: d4cc00239c5.pdf [file d4cc00239c5.pdf]

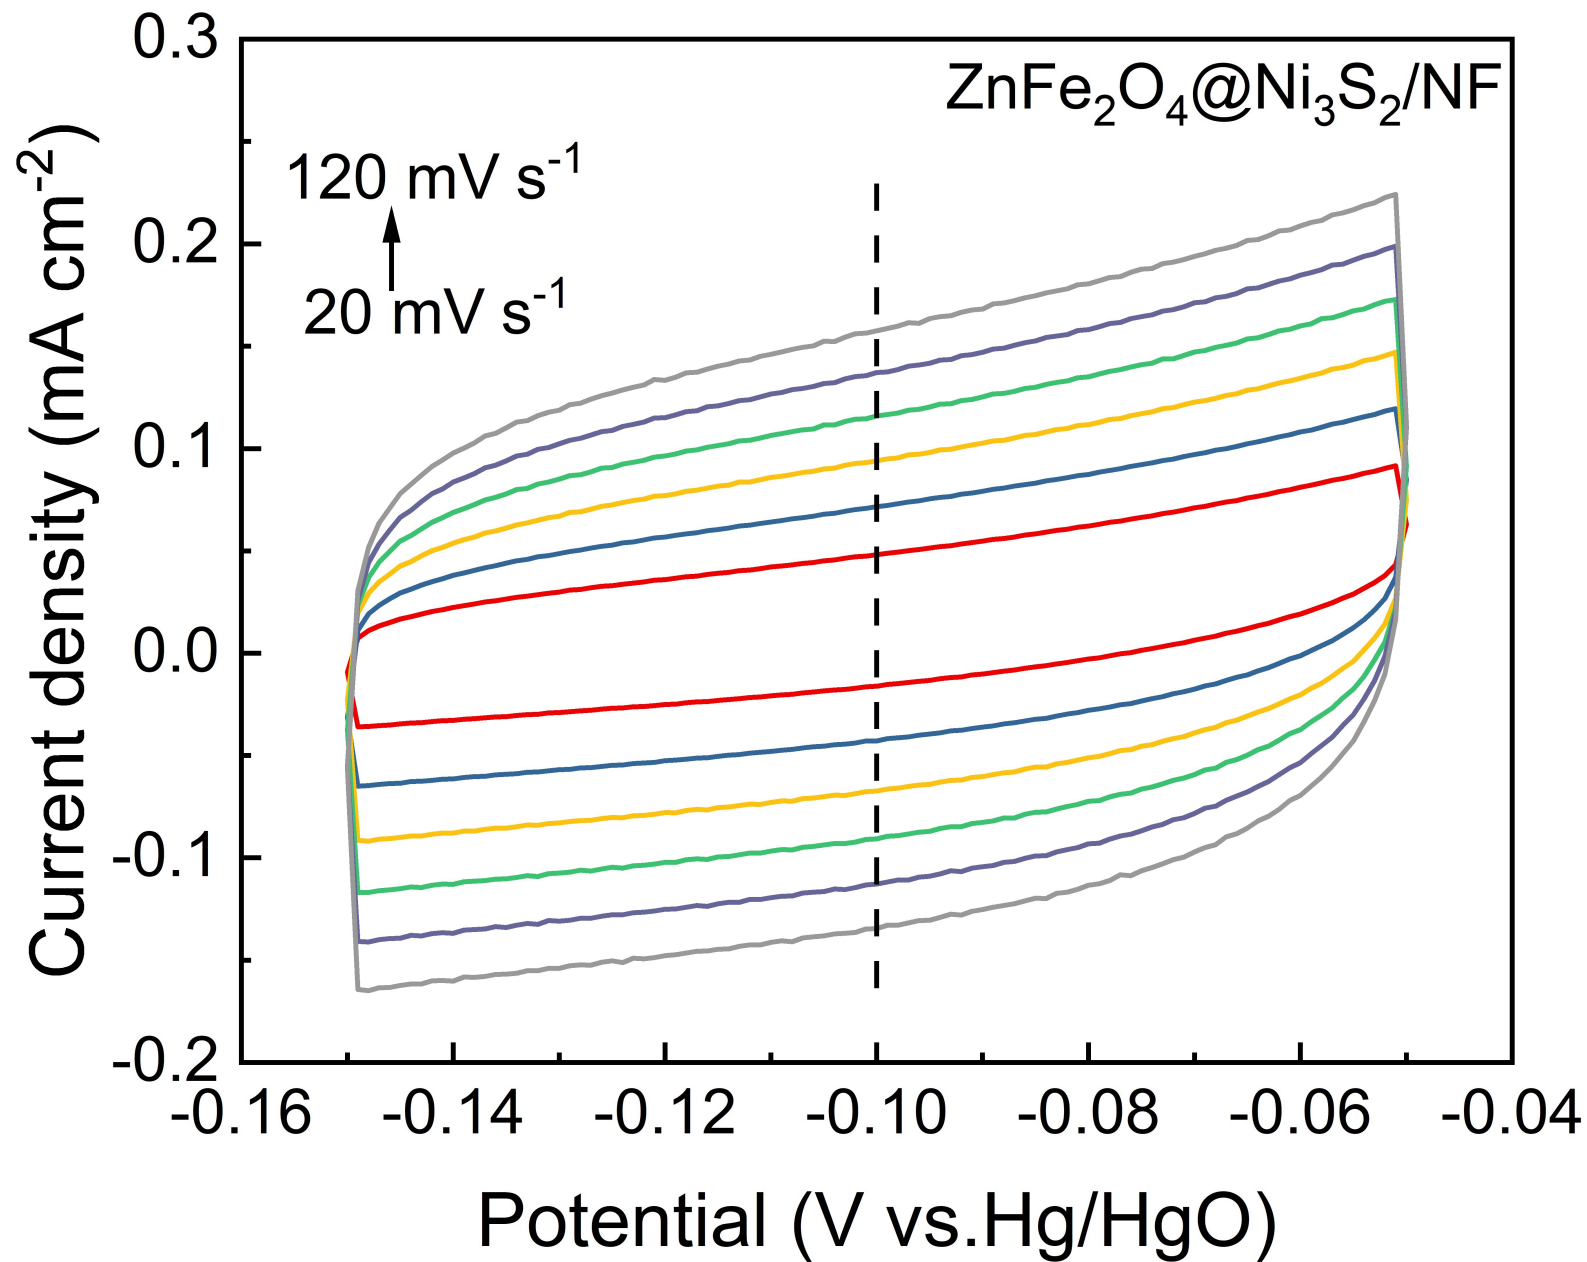

Supplement: d4cc00239c6.pdf [file d4cc00239c6.pdf]

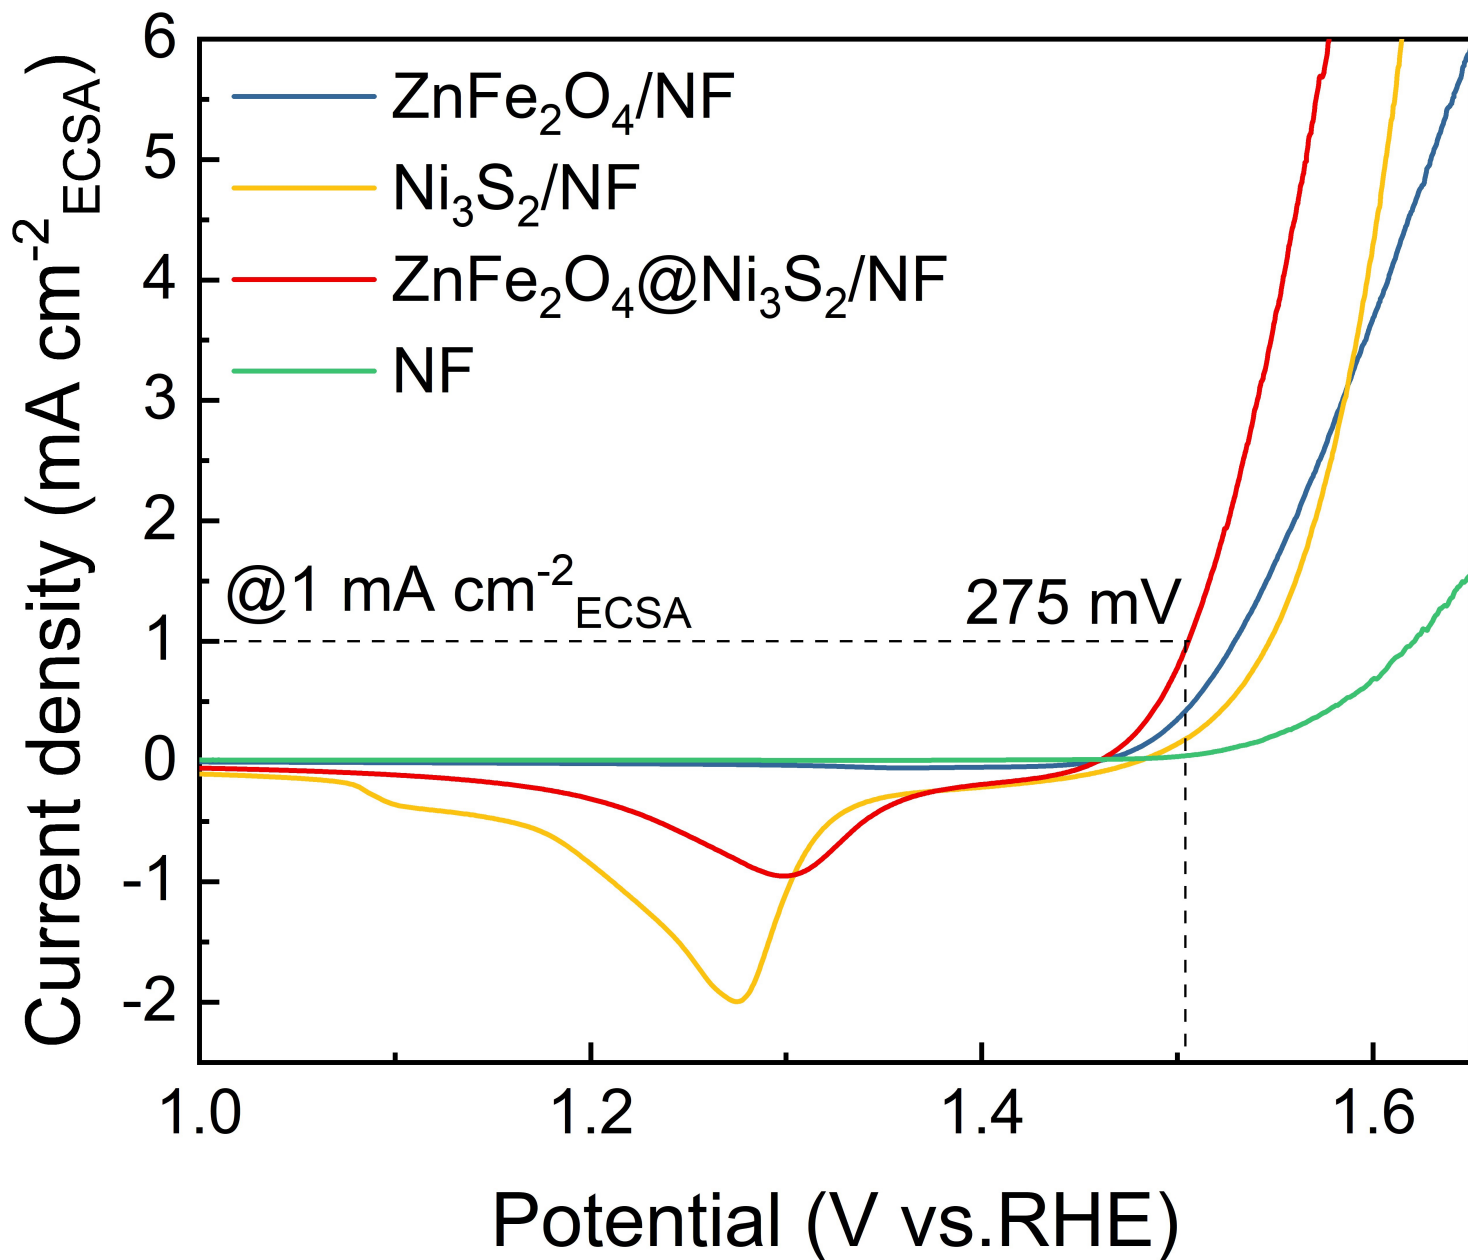

Supplement: d4cc00239c7.pdf [file d4cc00239c7.pdf]

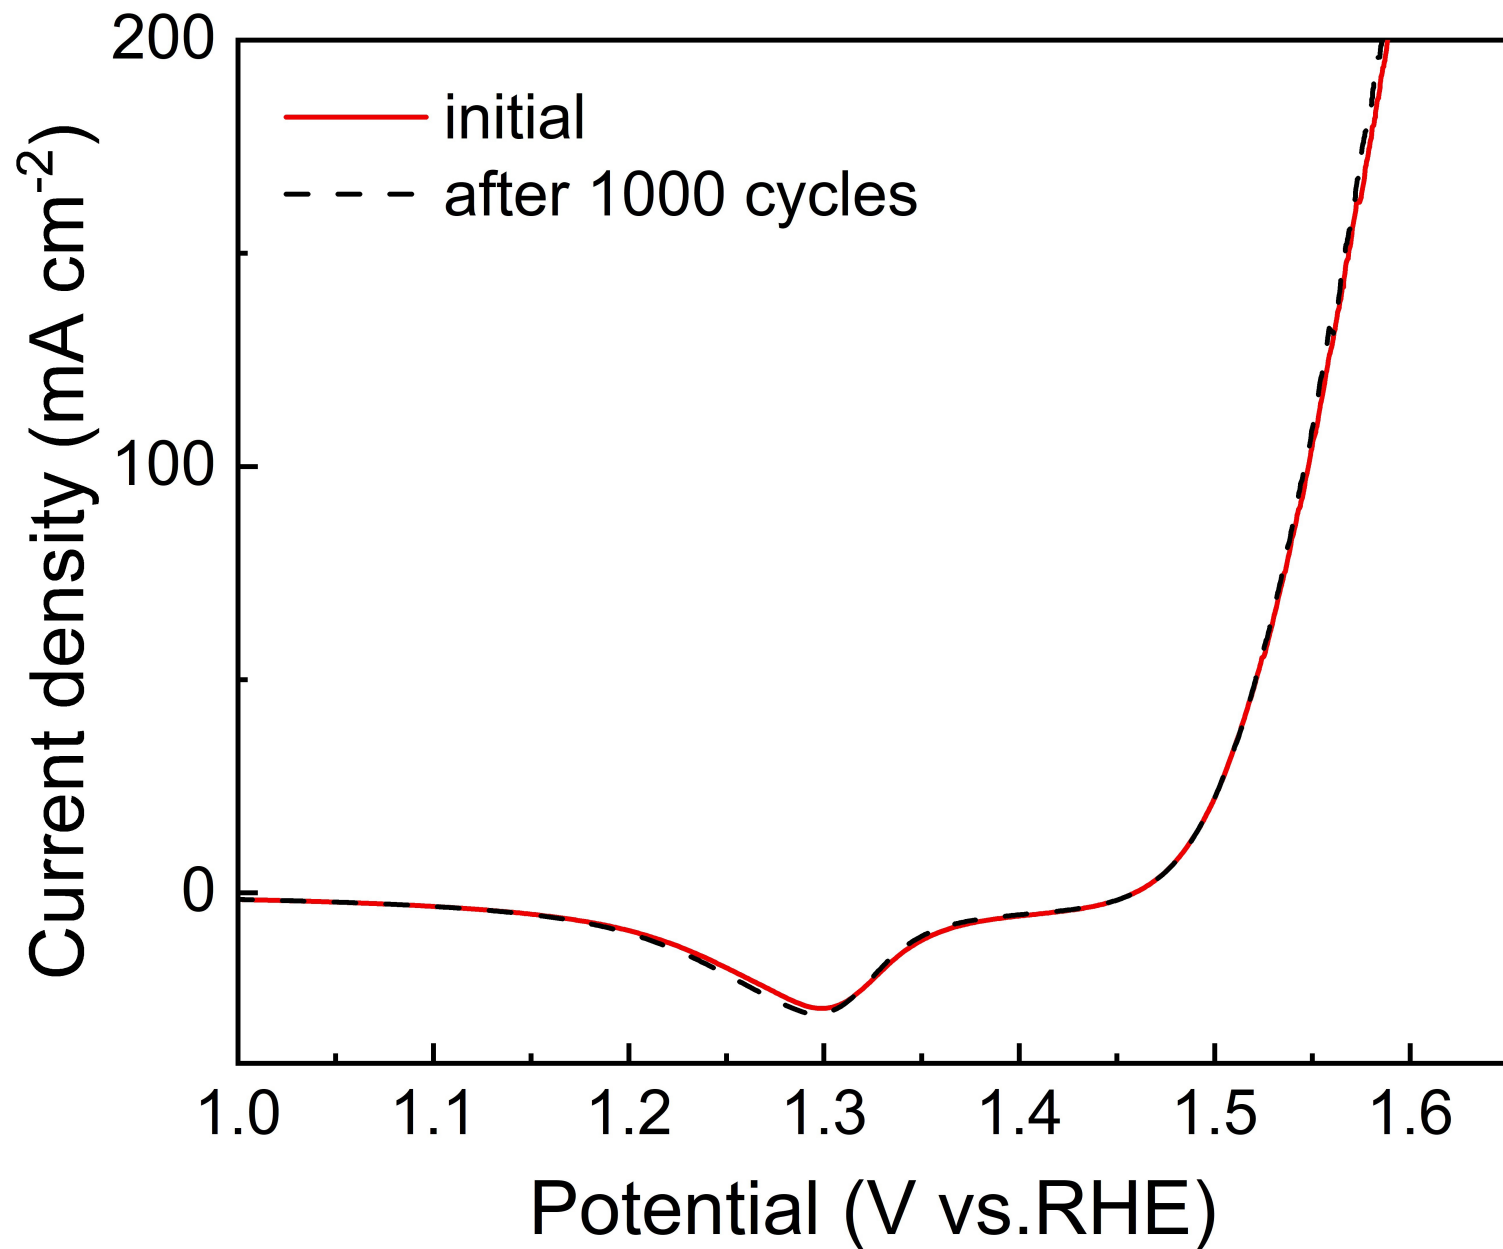

Supplement: d4cc00239c8.pdf [file d4cc00239c8.pdf]

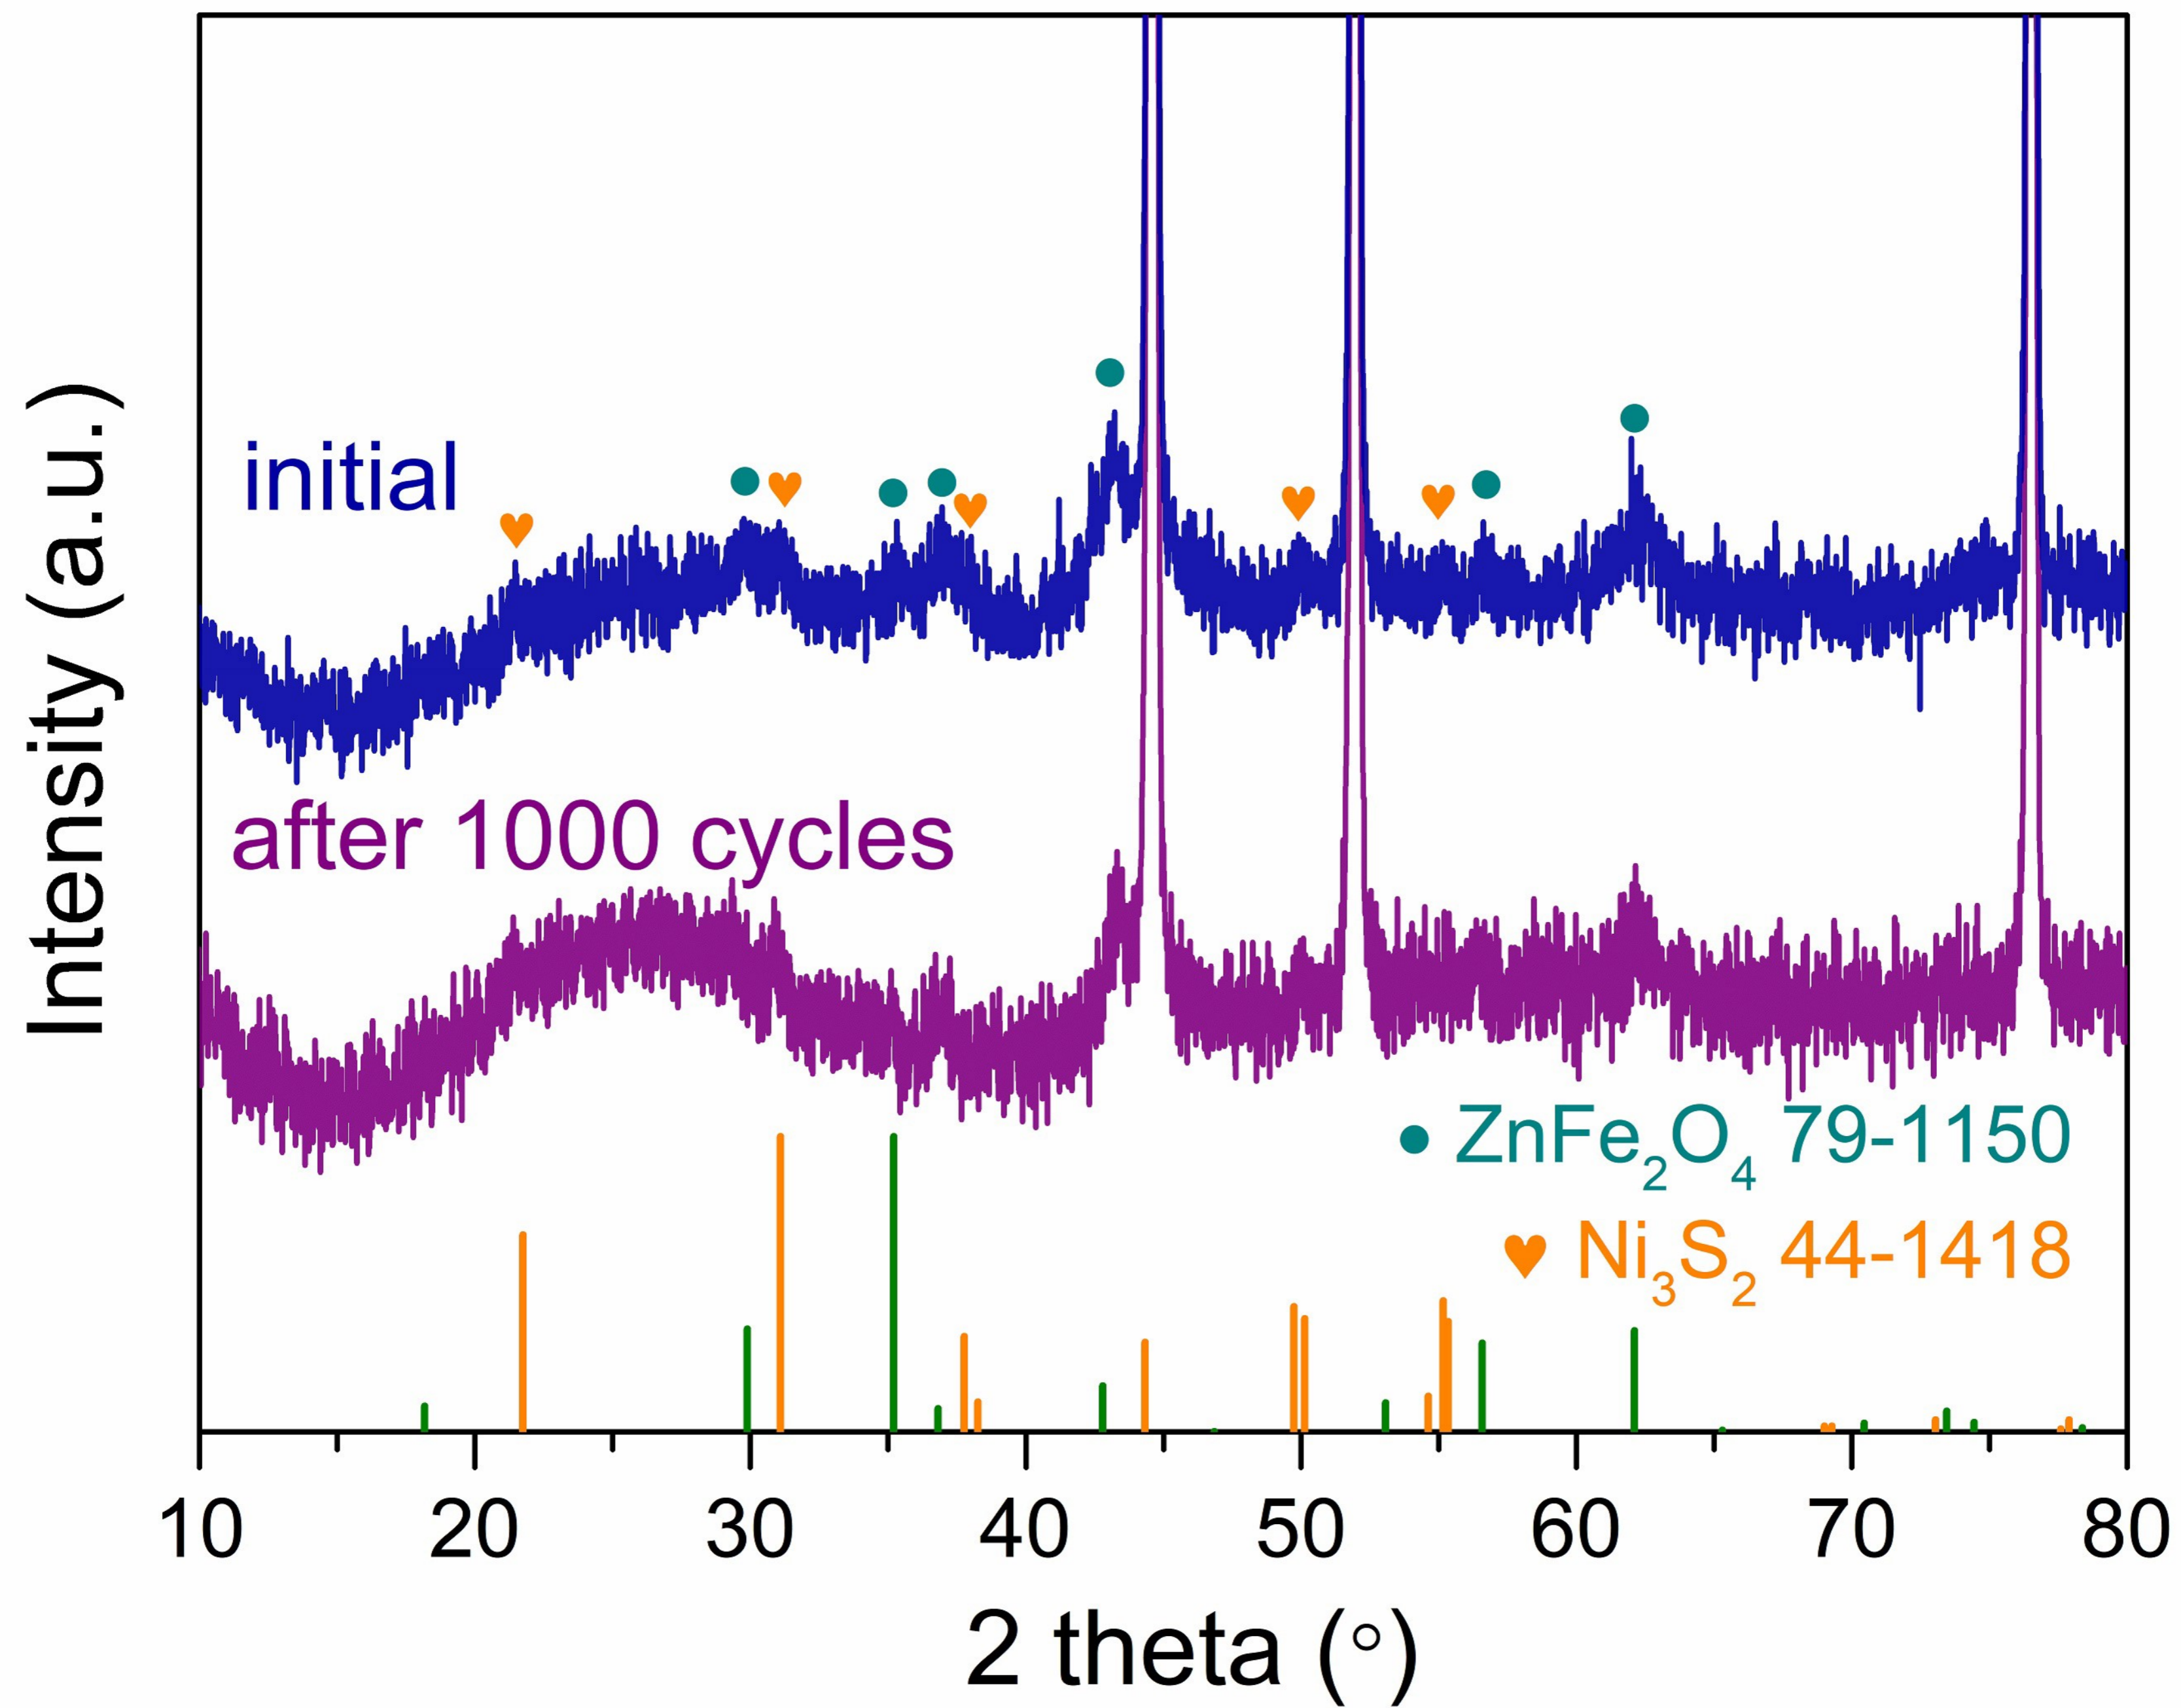

Supplement: d4cc00239c9.pdf [file d4cc00239c9.pdf]
